# Supplementary material
Source: publisher site journal article supplement (https://www.spandidos-publications.com/5215/downloadSupplementary)
Supplement: Supplementary file 1 [file downloadSupplementary]

## Sheet: EC109result-Significant
Table SIII. The differentially expressed genes by comparing HPV18-positive ESCC cells EC109 with HPV-negative cells HKESCC01.
Ensembl ID	Symbol	logFC	PValue
ENSG00000163295	ALPI	18.0698	6.58e-23
ENSG00000173702	MUC13	17.7092	3.14e-22
ENSG00000131620	ANO1	-17.5997	5.04e-22
ENSG00000058085	LAMC2	-13.1293	2.65e-21
ENSG00000004799	PDK4	16.6907	2.58e-20
ENSG00000137745	MMP13	-16.6424	3.18e-20
ENSG00000011052	NME1-NME2	16.5376	5.01e-20
ENSG00000064205	CCN5	16.5351	5.06e-20
ENSG00000248109	MARCOL	16.2787	1.54e-19
ENSG00000129824	RPS4Y1	-16.1267	2.96e-19
ENSG00000060982	BCAT1	-16.0277	4.55e-19
ENSG00000069535	MAOB	16.0256	4.59e-19
ENSG00000110195	FOLR1	12.3105	6.34e-19
ENSG00000175445	LPL	15.9403	6.64e-19
ENSG00000154277	UCHL1	-15.6205	2.65e-18
ENSG00000204291	COL15A1	11.7779	6.35e-18
ENSG00000103175	WFDC1	15.3676	7.91e-18
ENSG00000198681	MAGEA1	15.2804	1.15e-17
ENSG00000167754	KLK5	-15.28	1.16e-17
ENSG00000129451	KLK10	-15.1065	2.45e-17
ENSG00000086570	FAT2	-10.7154	2.52e-17
ENSG00000170571	EMB	-15.0814	2.73e-17
ENSG00000147889	CDKN2A	14.9596	4.62e-17
ENSG00000274618	H4C6	-14.9303	5.24e-17
ENSG00000181577	C6orf223	14.7931	9.48e-17
ENSG00000187634	SAMD11	11.1502	9.59e-17
ENSG00000181449	SOX2	-14.6888	1.49e-16
ENSG00000277586	NEFL	-14.6775	1.56e-16
ENSG00000087494	PTHLH	-10.7306	2.21e-16
ENSG00000067048	DDX3Y	-14.5716	2.47e-16
ENSG00000178343	SHISA3	14.5581	2.62e-16
ENSG00000115252	PDE1A	14.5469	2.74e-16
ENSG00000128340	RAC2	-14.5385	2.85e-16
ENSG00000275379	H3C11	-14.4699	3.83e-16
ENSG00000205420	KRT6A	-9.86541	4.31e-16
ENSG00000172572	PDE3A	10.2046	4.76e-16
ENSG00000006611	USH1C	10.5677	5.38e-16
ENSG00000180537	RNF182	10.0979	5.57e-16
ENSG00000075340	ADD2	-14.369	5.92e-16
ENSG00000114374	USP9Y	-14.332	6.94e-16
ENSG00000134709	HOOK1	-14.314	7.51e-16
ENSG00000104327	CALB1	-10.4436	7.63e-16
ENSG00000275126	H4C13	-14.3017	7.92e-16
ENSG00000189064	GAGE2A	14.2694	9.11e-16
ENSG00000175567	UCP2	14.2198	1.13e-15
ENSG00000065618	COL17A1	-9.66261	1.15e-15
ENSG00000134757	DSG3	-10.0798	1.43e-15
ENSG00000153822	KCNJ16	14.1375	1.61e-15
ENSG00000185518	SV2B	14.1074	1.83e-15
ENSG00000198286	CARD11	-14.0978	1.91e-15
ENSG00000183287	CCBE1	-14.0039	2.87e-15
ENSG00000121552	CSTA	-13.9319	3.9e-15
ENSG00000115008	IL1A	-9.7102	4.28e-15
ENSG00000060558	GNA15	-13.9012	4.47e-15
ENSG00000142273	CBLC	-13.8941	4.6e-15
ENSG00000169418	NPR1	9.83266	5.01e-15
ENSG00000150630	VEGFC	-13.8673	5.16e-15
ENSG00000173641	HSPB7	13.8462	5.65e-15
ENSG00000174469	CNTNAP2	-10.5833	5.66e-15
ENSG00000166049	PASD1	13.8263	6.15e-15
ENSG00000173237	C11orf86	13.7998	6.9e-15
ENSG00000149564	ESAM	10.1472	7.31e-15
ENSG00000162892	IL24	-13.7863	7.32e-15
ENSG00000108176	DNAJC12	13.7454	8.72e-15
ENSG00000137948	BRDT	-13.7419	8.85e-15
ENSG00000203499	IQANK1	-13.6671	1.22e-14
ENSG00000180767	CHST13	13.6648	1.23e-14
ENSG00000154864	PIEZO2	13.6561	1.28e-14
ENSG00000106278	PTPRZ1	-13.6206	1.49e-14
ENSG00000123843	C4BPB	9.33202	1.52e-14
ENSG00000101210	EEF1A2	9.06554	1.67e-14
ENSG00000002587	HS3ST1	-13.5882	1.72e-14
ENSG00000137975	CLCA2	-9.45582	1.74e-14
ENSG00000224902	GAGE12H	13.5758	1.81e-14
ENSG00000177494	ZBED2	-13.5717	1.85e-14
ENSG00000163286	ALPG	13.5385	2.12e-14
ENSG00000067646	ZFY	-13.531	2.2e-14
ENSG00000269113	TRABD2B	13.5253	2.25e-14
ENSG00000198758	EPS8L3	13.4945	2.57e-14
ENSG00000018236	CNTN1	-13.4851	2.69e-14
ENSG00000182107	TMEM30B	-10.2154	2.77e-14
ENSG00000143416	SELENBP1	13.475	2.79e-14
ENSG00000273301	AC016717.2	13.4671	2.89e-14
ENSG00000002746	HECW1	9.79754	3.3e-14
ENSG00000164114	MAP9	-13.4366	3.3e-14
ENSG00000206075	SERPINB5	-9.18447	3.32e-14
ENSG00000110427	KIAA1549L	-13.428	3.42e-14
ENSG00000197641	SERPINB13	-13.3897	4.04e-14
ENSG00000260458	KCNJ18	13.3856	4.11e-14
ENSG00000131435	PDLIM4	-13.3481	4.83e-14
ENSG00000170465	KRT6C	-9.13156	5.2e-14
ENSG00000183098	GPC6	-13.3041	5.83e-14
ENSG00000215269	GAGE12G	13.2903	6.18e-14
ENSG00000138271	GPR87	-13.272	6.7e-14
ENSG00000182013	PNMA8A	-13.2551	7.22e-14
ENSG00000171560	FGA	13.2529	7.26e-14
ENSG00000185261	KIAA0825	9.20631	7.47e-14
ENSG00000101194	SLC17A9	13.2414	7.64e-14
ENSG00000022556	NLRP2	-13.2343	7.88e-14
ENSG00000183742	MACC1	-13.2318	7.96e-14
ENSG00000183876	ARSI	-13.2244	8.21e-14
ENSG00000166670	MMP10	-13.2044	8.98e-14
ENSG00000137880	GCHFR	13.2027	9.02e-14
ENSG00000240184	PCDHGC3	-9.91614	1e-13
ENSG00000248527	MTATP6P1	10.4082	1.1e-13
ENSG00000013016	EHD3	-13.1557	1.11e-13
ENSG00000183878	UTY	-13.1505	1.13e-13
ENSG00000171246	NPTX1	8.77886	1.23e-13
ENSG00000145506	NKD2	10.3785	1.25e-13
ENSG00000104722	NEFM	-13.1174	1.3e-13
ENSG00000214510	SPINK13	13.1144	1.32e-13
ENSG00000171617	ENC1	-8.96969	1.41e-13
ENSG00000169594	BNC1	-8.86857	1.44e-13
ENSG00000186081	KRT5	-8.48566	1.44e-13
ENSG00000132698	RAB25	-13.0863	1.49e-13
ENSG00000168140	VASN	13.0721	1.58e-13
ENSG00000135925	WNT10A	-13.0712	1.59e-13
ENSG00000196611	MMP1	-9.20515	1.6e-13
ENSG00000176406	RIMS2	-13.0559	1.7e-13
ENSG00000163739	CXCL1	-9.1894	1.71e-13
ENSG00000133454	MYO18B	-13.0362	1.85e-13
ENSG00000104413	ESRP1	-8.62554	1.85e-13
ENSG00000140832	MARVELD3	-13.0277	1.92e-13
ENSG00000158104	HPD	13.0231	1.95e-13
ENSG00000183347	GBP6	-13.022	1.97e-13
ENSG00000180834	MAP6D1	-13.0105	2.06e-13
ENSG00000169031	COL4A3	13.0096	2.07e-13
ENSG00000103241	FOXF1	12.9973	2.18e-13
ENSG00000154764	WNT7A	-12.9902	2.26e-13
ENSG00000134917	ADAMTS8	12.9793	2.36e-13
ENSG00000012817	KDM5D	-12.9666	2.49e-13
ENSG00000153707	PTPRD	12.9569	2.6e-13
ENSG00000123838	C4BPA	12.9527	2.63e-13
ENSG00000087128	TMPRSS11E	-12.929	2.93e-13
ENSG00000148680	HTR7	-12.9274	2.95e-13
ENSG00000213931	HBE1	12.9227	3.01e-13
ENSG00000162493	PDPN	-8.75091	3.08e-13
ENSG00000165617	DACT1	-12.9136	3.13e-13
ENSG00000083307	GRHL2	-8.62661	3.37e-13
ENSG00000172716	SLFN11	-12.895	3.4e-13
ENSG00000100842	EFS	-12.873	3.73e-13
ENSG00000159166	LAD1	-8.44749	3.99e-13
ENSG00000114854	TNNC1	12.8517	4.06e-13
ENSG00000135373	EHF	-8.65314	4.09e-13
ENSG00000230937	MIR205HG	-8.46194	4.25e-13
ENSG00000147027	TMEM47	12.8364	4.35e-13
ENSG00000167972	ABCA3	8.51571	4.44e-13
ENSG00000125538	IL1B	-8.42093	4.64e-13
ENSG00000269586	CT45A10	12.8164	4.75e-13
ENSG00000147697	GSDMC	-12.8065	4.95e-13
ENSG00000133135	RNF128	-12.7998	5.09e-13
ENSG00000129455	KLK8	-12.7965	5.16e-13
ENSG00000112541	PDE10A	8.36559	5.18e-13
ENSG00000178860	MSC	-12.7814	5.54e-13
ENSG00000185269	NOTUM	12.7577	6.11e-13
ENSG00000163283	ALPP	8.18331	6.24e-13
ENSG00000196557	CACNA1H	12.7397	6.57e-13
ENSG00000107295	SH3GL2	12.7233	7.07e-13
ENSG00000144460	NYAP2	12.7216	7.12e-13
ENSG00000109452	INPP4B	-8.63749	7.18e-13
ENSG00000254221	PCDHGB1	-12.7175	7.28e-13
ENSG00000158089	GALNT14	-12.7175	7.28e-13
ENSG00000053108	FSTL4	8.2172	7.35e-13
ENSG00000163624	CDS1	-12.714	7.38e-13
ENSG00000148700	ADD3	-8.61702	7.83e-13
ENSG00000198732	SMOC1	8.17989	7.97e-13
ENSG00000268388	FENDRR	12.6795	8.51e-13
ENSG00000171345	KRT19	-8.16234	8.93e-13
ENSG00000126217	MCF2L	8.20972	1.01e-12
ENSG00000145284	SCD5	-12.6226	1.09e-12
ENSG00000054983	GALC	-12.6132	1.13e-12
ENSG00000104998	IL27RA	-12.6075	1.16e-12
ENSG00000171564	FGB	12.6041	1.18e-12
ENSG00000165025	SYK	-12.5902	1.26e-12
ENSG00000166676	TVP23A	8.47318	1.29e-12
ENSG00000197766	CFD	12.5453	1.51e-12
ENSG00000186847	KRT14	-7.95791	1.53e-12
ENSG00000182866	LCK	-12.5412	1.55e-12
ENSG00000129194	SOX15	-8.6601	1.67e-12
ENSG00000085563	ABCB1	12.5168	1.72e-12
ENSG00000197632	SERPINB2	-12.513	1.75e-12
ENSG00000275410	HNF1B	12.5092	1.78e-12
ENSG00000148671	ADIRF	-12.4925	1.9e-12
ENSG00000101076	HNF4A	9.73591	1.96e-12
ENSG00000115221	ITGB6	-8.35297	2e-12
ENSG00000204381	LAYN	-12.4717	2.09e-12
ENSG00000259399	TGIF2-RAB5IF	9.71874	2.12e-12
ENSG00000261780	LINC02582	-12.4675	2.13e-12
ENSG00000214049	UCA1	-12.4654	2.15e-12
ENSG00000164647	STEAP1	-12.4654	2.15e-12
ENSG00000134376	CRB1	12.4603	2.18e-12
ENSG00000171517	LPAR3	-12.4548	2.24e-12
ENSG00000277693	AP003900.1	12.4503	2.28e-12
ENSG00000160183	TMPRSS3	8.40789	2.32e-12
ENSG00000169551	CT55	12.4382	2.41e-12
ENSG00000239920	AC104389.5	12.4342	2.45e-12
ENSG00000272620	AFAP1-AS1	-7.93957	2.58e-12
ENSG00000100473	COCH	-12.414	2.66e-12
ENSG00000156299	TIAM1	-12.4075	2.73e-12
ENSG00000157227	MMP14	-7.88352	3.1e-12
ENSG00000146678	IGFBP1	12.37	3.22e-12
ENSG00000256235	SMIM3	-12.363	3.31e-12
ENSG00000185201	IFITM2	8.11256	3.34e-12
ENSG00000163297	ANTXR2	-8.4913	3.44e-12
ENSG00000156103	MMP16	-12.3494	3.5e-12
ENSG00000205562	AL049775.1	-12.338	3.68e-12
ENSG00000168079	SCARA5	12.3291	3.82e-12
ENSG00000183397	C19orf71	12.3291	3.82e-12
ENSG00000130600	H19	7.91681	3.86e-12
ENSG00000105889	STEAP1B	-12.3241	3.93e-12
ENSG00000153292	ADGRF1	-12.3241	3.93e-12
ENSG00000274049	INO80B-WBP1	12.3226	3.93e-12
ENSG00000229544	NKX1-2	-12.3148	4.09e-12
ENSG00000143365	RORC	12.3116	4.12e-12
ENSG00000114948	ADAM23	-12.3055	4.25e-12
ENSG00000185070	FLRT2	-7.85503	4.43e-12
ENSG00000218336	TENM3	-8.12777	4.48e-12
ENSG00000120211	INSL4	12.2916	4.5e-12
ENSG00000111335	OAS2	-12.2913	4.5e-12
ENSG00000141639	MAPK4	12.2826	4.64e-12
ENSG00000090539	CHRD	12.2713	4.88e-12
ENSG00000162551	ALPL	7.6795	4.92e-12
ENSG00000121297	TSHZ3	-12.2674	4.97e-12
ENSG00000168646	AXIN2	8.62512	5.11e-12
ENSG00000057704	TMCC3	-12.2601	5.13e-12
ENSG00000156587	UBE2L6	-12.2577	5.18e-12
ENSG00000237671	GAGE12C	12.2577	5.18e-12
ENSG00000159184	HOXB13	12.2554	5.23e-12
ENSG00000164400	CSF2	-12.2553	5.23e-12
ENSG00000055732	MCOLN3	-12.2553	5.23e-12
ENSG00000186198	SLC51B	12.2508	5.34e-12
ENSG00000075461	CACNG4	-12.2479	5.39e-12
ENSG00000092068	SLC7A8	-8.07608	5.59e-12
ENSG00000167355	OR51B5	12.2392	5.61e-12
ENSG00000113657	DPYSL3	-7.72718	6.85e-12
ENSG00000123892	RAB38	-12.1906	6.91e-12
ENSG00000284378	MIR1244-1	9.43836	7.04e-12
ENSG00000198223	CSF2RA	8.83733	7.34e-12
ENSG00000169429	CXCL8	-7.68817	7.36e-12
ENSG00000171401	KRT13	-12.1623	7.77e-12
ENSG00000257042	AC008011.2	-12.1519	8.2e-12
ENSG00000196754	S100A2	-7.55854	8.52e-12
ENSG00000198093	ZNF649	-12.1414	8.56e-12
ENSG00000081277	PKP1	-7.65958	8.68e-12
ENSG00000185760	KCNQ5	-12.1282	9.04e-12
ENSG00000103460	TOX3	12.1234	9.25e-12
ENSG00000146904	EPHA1	-12.1229	9.25e-12
ENSG00000197261	C6orf141	-12.1202	9.35e-12
ENSG00000169213	RAB3B	-8.03854	9.4e-12
ENSG00000131018	SYNE1	7.77135	9.4e-12
ENSG00000176658	MYO1D	-7.71146	9.44e-12
ENSG00000182986	ZNF320	8.4801	9.5e-12
ENSG00000115457	IGFBP2	-12.1122	9.66e-12
ENSG00000186448	ZNF197	12.1057	9.88e-12
ENSG00000134775	FHOD3	-7.71794	9.93e-12
ENSG00000170006	TMEM154	-12.0987	1.02e-11
ENSG00000274274	GAGE13	12.0826	1.09e-11
ENSG00000086717	PPEF1	12.0826	1.09e-11
ENSG00000095303	PTGS1	7.64468	1.11e-11
ENSG00000179059	ZFP42	-12.0741	1.13e-11
ENSG00000134668	SPOCD1	-12.063	1.2e-11
ENSG00000117595	IRF6	-7.56995	1.2e-11
ENSG00000274290	H2BC6	-7.58292	1.25e-11
ENSG00000119698	PPP4R4	-12.049	1.27e-11
ENSG00000128591	FLNC	-12.0462	1.28e-11
ENSG00000122641	INHBA	-7.81666	1.32e-11
ENSG00000137868	STRA6	-12.0349	1.35e-11
ENSG00000132321	IQCA1	-12.0264	1.39e-11
ENSG00000110002	VWA5A	7.51403	1.41e-11
ENSG00000114115	RBP1	-12.0178	1.44e-11
ENSG00000131002	TXLNGY	-8.45494	1.5e-11
ENSG00000235531	MSC-AS1	-9.3368	1.51e-11
ENSG00000065325	GLP2R	7.58	1.51e-11
ENSG00000166396	SERPINB7	-12.0005	1.55e-11
ENSG00000286042	LCAL1	-11.9889	1.63e-11
ENSG00000118402	ELOVL4	-11.9859	1.65e-11
ENSG00000119508	NR4A3	7.86605	1.75e-11
ENSG00000267041	ZNF850	-11.9712	1.77e-11
ENSG00000204179	PTPN20	-11.9683	1.8e-11
ENSG00000285292	ABCF2	11.9642	1.82e-11
ENSG00000250337	PURPL	8.62313	1.84e-11
ENSG00000101188	NTSR1	11.9613	1.84e-11
ENSG00000139874	SSTR1	11.9585	1.86e-11
ENSG00000130707	ASS1	7.33848	1.88e-11
ENSG00000065621	GSTO2	-7.8305	1.89e-11
ENSG00000109819	PPARGC1A	8.13305	1.91e-11
ENSG00000170382	LRRN2	8.31477	1.92e-11
ENSG00000146374	RSPO3	11.9415	2.01e-11
ENSG00000122861	PLAU	-7.36865	2.02e-11
ENSG00000248874	C5orf17	11.9387	2.03e-11
ENSG00000254870	ATP6V1G2-DDX39B	11.9358	2.06e-11
ENSG00000261115	TMEM178B	7.58168	2.08e-11
ENSG00000143469	SYT14	-11.9322	2.08e-11
ENSG00000144369	FAM171B	-11.9169	2.22e-11
ENSG00000170627	GTSF1	-8.05626	2.22e-11
ENSG00000149380	P4HA3	7.70322	2.27e-11
ENSG00000229618	AC011287.1	-11.9076	2.31e-11
ENSG00000151702	FLI1	-11.9076	2.31e-11
ENSG00000258548	LINC00645	-11.9076	2.31e-11
ENSG00000153294	ADGRF4	-11.9045	2.34e-11
ENSG00000140297	GCNT3	11.8922	2.46e-11
ENSG00000178163	ZNF518B	-7.66889	2.49e-11
ENSG00000167332	OR51E2	11.8774	2.62e-11
ENSG00000185686	PRAME	11.8714	2.69e-11
ENSG00000113721	PDGFRB	11.8714	2.69e-11
ENSG00000198829	SUCNR1	-11.8668	2.77e-11
ENSG00000257921	AC025165.3	-11.8668	2.77e-11
ENSG00000026559	KCNG1	-11.8668	2.77e-11
ENSG00000257379	AC023509.1	-11.8636	2.8e-11
ENSG00000141540	TTYH2	-11.8572	2.88e-11
ENSG00000069188	SDK2	-11.8572	2.88e-11
ENSG00000108825	PTGES3L-AARSD1	11.8534	2.92e-11
ENSG00000287426	AP003327.2	-11.8476	2.99e-11
ENSG00000161905	ALOX15	11.8473	2.99e-11
ENSG00000140937	CDH11	-7.39872	3e-11
ENSG00000180543	TSPYL5	-7.98268	3.04e-11
ENSG00000197153	H3C12	-7.41956	3.19e-11
ENSG00000119946	CNNM1	-11.8314	3.2e-11
ENSG00000169083	AR	11.8258	3.25e-11
ENSG00000179855	GIPC3	7.4969	3.26e-11
ENSG00000196189	SEMA4A	-8.56504	3.29e-11
ENSG00000277947	SNORD3D	-8.56314	3.32e-11
ENSG00000089723	OTUB2	-11.815	3.43e-11
ENSG00000099725	PRKY	-8.25813	3.48e-11
ENSG00000107105	ELAVL2	-11.7984	3.67e-11
ENSG00000262202	AC007952.4	-8.53822	3.71e-11
ENSG00000000003	TSPAN6	-7.70044	3.99e-11
ENSG00000091129	NRCAM	-11.7782	3.99e-11
ENSG00000136167	LCP1	-7.5514	4.11e-11
ENSG00000139174	PRICKLE1	-11.7646	4.22e-11
ENSG00000006555	TTC22	-11.7612	4.34e-11
ENSG00000053747	LAMA3	-7.15077	4.37e-11
ENSG00000198624	CCDC69	-11.7509	4.53e-11
ENSG00000198692	EIF1AY	-11.7439	4.66e-11
ENSG00000278456	AC015712.7	-11.723	5.08e-11
ENSG00000176490	DIRAS1	11.7168	5.15e-11
ENSG00000262943	ALOX12P2	-7.85834	5.18e-11
ENSG00000142619	PADI3	-11.7159	5.23e-11
ENSG00000276547	PCDHGB5	-7.52018	5.28e-11
ENSG00000184702	SEPTIN5	11.7101	5.31e-11
ENSG00000231419	LINC00689	11.7101	5.31e-11
ENSG00000242779	ZNF702P	11.7068	5.38e-11
ENSG00000115526	CHST10	-11.6946	5.71e-11
ENSG00000169469	SPRR1B	-11.6874	5.88e-11
ENSG00000136688	IL36G	-11.6874	5.88e-11
ENSG00000111224	PARP11	-11.6838	5.97e-11
ENSG00000165521	EML5	-11.6838	5.97e-11
ENSG00000139973	SYT16	-11.6656	6.43e-11
ENSG00000136542	GALNT5	-11.6434	7.16e-11
ENSG00000224659	GAGE12J	11.6416	7.16e-11
ENSG00000128602	SMO	-7.56086	7.25e-11
ENSG00000238125	SLC9A3P2	-11.636	7.38e-11
ENSG00000135074	ADAM19	-11.6285	7.61e-11
ENSG00000186088	GSAP	-11.621	7.85e-11
ENSG00000130558	OLFM1	7.19356	7.91e-11
ENSG00000021826	CPS1	7.00524	8.02e-11
ENSG00000170542	SERPINB9	-11.6134	8.1e-11
ENSG00000136237	RAPGEF5	-7.48801	8.15e-11
ENSG00000023892	DEF6	-7.74886	8.24e-11
ENSG00000102359	SRPX2	-11.6058	8.36e-11
ENSG00000183072	NKX2-5	-11.5981	8.62e-11
ENSG00000165246	NLGN4Y	-11.5981	8.62e-11
ENSG00000188112	C6orf132	-7.47299	8.67e-11
ENSG00000115112	TFCP2L1	-11.5943	8.76e-11
ENSG00000164509	IL31RA	-11.5943	8.76e-11
ENSG00000128011	LRFN1	-11.5943	8.76e-11
ENSG00000116183	PAPPA2	7.16554	8.91e-11
ENSG00000109255	NMU	-11.5788	9.34e-11
ENSG00000188511	C22orf34	11.577	9.34e-11
ENSG00000167165	UGT1A6	-7.71943	9.36e-11
ENSG00000132164	SLC6A11	-11.5671	9.8e-11
ENSG00000172201	ID4	-11.5671	9.8e-11
ENSG00000127152	BCL11B	-7.40553	9.87e-11
ENSG00000140015	KCNH5	11.5623	9.96e-11
ENSG00000178222	RNF212	11.5623	9.96e-11
ENSG00000259976	AC093010.3	7.92421	1.02e-10
ENSG00000184860	SDR42E1	-7.43087	1.04e-10
ENSG00000172817	CYP7B1	-11.5514	1.05e-10
ENSG00000225383	SFTA1P	-11.5474	1.06e-10
ENSG00000286450	AC021573.1	11.5399	1.1e-10
ENSG00000124249	KCNK15	7.50597	1.1e-10
ENSG00000060140	STYK1	-11.5354	1.12e-10
ENSG00000105929	ATP6V0A4	11.5247	1.17e-10
ENSG00000186487	MYT1L	11.5247	1.17e-10
ENSG00000205777	GAGE1	11.5247	1.17e-10
ENSG00000076344	RGS11	11.5171	1.21e-10
ENSG00000187689	AMTN	-11.5152	1.21e-10
ENSG00000163825	RTP3	-11.5112	1.25e-10
ENSG00000276075	AC027682.6	11.5094	1.25e-10
ENSG00000064655	EYA2	-11.4948	1.34e-10
ENSG00000240893	LINC02042	-11.4657	1.51e-10
ENSG00000213145	CRIP1	6.936	1.52e-10
ENSG00000091656	ZFHX4	-7.08536	1.55e-10
ENSG00000249816	LINC00964	-11.4572	1.56e-10
ENSG00000254692	AL136295.1	11.4505	1.59e-10
ENSG00000171557	FGG	11.4425	1.65e-10
ENSG00000107242	PIP5K1B	7.80456	1.69e-10
ENSG00000253161	LINC01605	-11.4359	1.71e-10
ENSG00000267757	EML2-AS1	11.4181	1.83e-10
ENSG00000263244	AC087190.3	-6.92004	1.9e-10
ENSG00000229989	MIR181A1HG	-11.4056	1.93e-10
ENSG00000266714	MYO15B	6.88994	1.95e-10
ENSG00000150627	WDR17	-11.3968	2.01e-10
ENSG00000171033	PKIA	-11.3968	2.01e-10
ENSG00000163993	S100P	7.05239	2.03e-10
ENSG00000169740	ZNF32	-11.3879	2.08e-10
ENSG00000154760	SLFN13	-11.379	2.16e-10
ENSG00000139211	AMIGO2	-6.90792	2.16e-10
ENSG00000183305	MAGEA2B	-7.21633	2.21e-10
ENSG00000100077	GRK3	-6.84325	2.21e-10
ENSG00000062038	CDH3	-6.80737	2.24e-10
ENSG00000111452	ADGRD1	7.3376	2.25e-10
ENSG00000119138	KLF9	6.98773	2.25e-10
ENSG00000167723	TRPV3	-11.3701	2.28e-10
ENSG00000222047	C10orf55	-11.3701	2.28e-10
ENSG00000280693	SH3PXD2A-AS1	-11.3701	2.28e-10
ENSG00000086289	EPDR1	7.73058	2.32e-10
ENSG00000146477	SLC22A3	7.32518	2.37e-10
ENSG00000117525	F3	-6.76383	2.39e-10
ENSG00000154451	GBP5	-11.3565	2.41e-10
ENSG00000164741	DLC1	-11.3565	2.41e-10
ENSG00000141527	CARD14	6.91326	2.44e-10
ENSG00000169515	CCDC8	-7.79937	2.44e-10
ENSG00000116745	RPE65	-11.352	2.45e-10
ENSG00000169174	PCSK9	6.74944	2.54e-10
ENSG00000103490	PYCARD	-11.3428	2.55e-10
ENSG00000261934	PCDHGA9	-11.3428	2.55e-10
ENSG00000205978	NYNRIN	-7.47974	2.58e-10
ENSG00000177614	PGBD5	-11.3383	2.6e-10
ENSG00000198885	ITPRIPL1	-11.3383	2.6e-10
ENSG00000226476	LINC01748	-11.329	2.7e-10
ENSG00000130052	STARD8	7.21754	2.77e-10
ENSG00000285517	AC010198.2	-7.37038	2.8e-10
ENSG00000162520	SYNC	7.03428	2.93e-10
ENSG00000081052	COL4A4	6.91967	3.02e-10
ENSG00000168955	TM4SF20	11.2986	3.02e-10
ENSG00000197822	OCLN	-11.2963	3.08e-10
ENSG00000196440	ARMCX4	-11.2963	3.08e-10
ENSG00000106018	VIPR2	11.2897	3.14e-10
ENSG00000172818	OVOL1	-11.2868	3.21e-10
ENSG00000166866	MYO1A	11.2852	3.21e-10
ENSG00000132530	XAF1	-11.2773	3.33e-10
ENSG00000273760	AC245041.1	11.2762	3.33e-10
ENSG00000099284	MACROH2A2	-7.07847	3.47e-10
ENSG00000259672	AC087612.1	-11.2628	3.54e-10
ENSG00000268902	CSAG2	-11.2628	3.54e-10
ENSG00000231764	DLX6-AS1	-11.258	3.61e-10
ENSG00000130766	SESN2	-11.2531	3.68e-10
ENSG00000205485	AC004980.1	-11.2531	3.68e-10
ENSG00000251095	AC093866.1	6.79359	3.73e-10
ENSG00000171631	P2RY6	7.04566	3.75e-10
ENSG00000187398	LUZP2	7.04566	3.75e-10
ENSG00000144115	THNSL2	-11.2286	4.07e-10
ENSG00000268916	CSAG3	-11.2236	4.15e-10
ENSG00000206341	HLA-H	-11.2236	4.15e-10
ENSG00000152454	AC010326.1	-11.2236	4.15e-10
ENSG00000233198	RNF224	11.2209	4.24e-10
ENSG00000106991	ENG	6.69528	4.25e-10
ENSG00000155622	XAGE2	11.2114	4.41e-10
ENSG00000135346	CGA	11.2114	4.41e-10
ENSG00000178172	SPINK6	6.90076	4.48e-10
ENSG00000131711	MAP1B	-6.65992	4.57e-10
ENSG00000157064	NMNAT2	-11.2036	4.6e-10
ENSG00000221944	TIGD1	11.202	4.6e-10
ENSG00000240771	ARHGEF25	-11.1985	4.69e-10
ENSG00000178401	DNAJC22	6.85028	4.72e-10
ENSG00000152766	ANKRD22	-11.1884	4.89e-10
ENSG00000198719	DLL1	-11.1884	4.89e-10
ENSG00000039068	CDH1	-6.63572	5.09e-10
ENSG00000001561	ENPP4	-11.1781	5.1e-10
ENSG00000185561	TLCD2	11.178	5.1e-10
ENSG00000185909	KLHDC8B	-11.1678	5.32e-10
ENSG00000207165	SNORA70	-7.90821	5.4e-10
ENSG00000227488	GAGE12D	11.1536	5.55e-10
ENSG00000101680	LAMA1	6.80144	5.56e-10
ENSG00000248905	FMN1	-7.29451	5.67e-10
ENSG00000165821	SALL2	-11.1522	5.67e-10
ENSG00000136155	SCEL	-7.4167	5.74e-10
ENSG00000107249	GLIS3	6.67085	6.13e-10
ENSG00000165359	INTS6L	-11.1205	6.45e-10
ENSG00000167642	SPINT2	-6.55413	6.58e-10
ENSG00000278621	AC037198.2	-11.1152	6.6e-10
ENSG00000204219	TCEA3	11.1086	6.74e-10
ENSG00000279117	AP001972.5	8.35769	6.91e-10
ENSG00000175928	LRRN1	-7.2462	6.97e-10
ENSG00000156113	KCNMA1	-11.099	7.05e-10
ENSG00000197614	MFAP5	-6.60566	7.19e-10
ENSG00000182580	EPHB3	-11.0936	7.2e-10
ENSG00000188060	RAB42	6.88714	7.34e-10
ENSG00000269096	CT45A3	11.0881	7.37e-10
ENSG00000179023	KLHDC7A	11.083	7.53e-10
ENSG00000140057	AK7	11.083	7.53e-10
ENSG00000112297	CRYBG1	-6.61865	7.69e-10
ENSG00000145242	EPHA5	11.0778	7.7e-10
ENSG00000155265	GOLGA7B	-11.0772	7.7e-10
ENSG00000092096	SLC22A17	-11.0772	7.7e-10
ENSG00000198910	L1CAM	6.49137	7.77e-10
ENSG00000144152	FBLN7	7.43313	8.14e-10
ENSG00000254290	AC124067.4	11.0621	8.24e-10
ENSG00000197020	ZNF100	11.0569	8.43e-10
ENSG00000178826	TMEM139	7.42046	8.6e-10
ENSG00000153551	CMTM7	-11.0494	8.63e-10
ENSG00000171757	LRRC34	-11.0494	8.63e-10
ENSG00000196337	CGB7	-11.0494	8.63e-10
ENSG00000159164	SV2A	-11.0438	8.82e-10
ENSG00000187243	MAGED4B	-11.0438	8.82e-10
ENSG00000166402	TUB	-6.8071	8.86e-10
ENSG00000170153	RNF150	6.68736	9.02e-10
ENSG00000146166	LGSN	11.041	9.03e-10
ENSG00000142303	ADAMTS10	7.6978	9.26e-10
ENSG00000100739	BDKRB1	-7.17572	9.38e-10
ENSG00000164197	RNF180	-11.0325	9.46e-10
ENSG00000285612	AC004974.1	-11.0268	9.68e-10
ENSG00000162399	BSND	11.0196	9.91e-10
ENSG00000101197	BIRC7	11.0196	9.91e-10
ENSG00000181634	TNFSF15	-7.28269	1.01e-09
ENSG00000077585	GPR137B	-11.0153	1.01e-09
ENSG00000006638	TBXA2R	6.85501	1.02e-09
ENSG00000169129	AFAP1L2	-6.51368	1.03e-09
ENSG00000145431	PDGFC	-6.85191	1.04e-09
ENSG00000182327	GLTPD2	11.0087	1.04e-09
ENSG00000246082	NUDT16P1	7.36603	1.09e-09
ENSG00000108932	SLC16A6	6.44047	1.1e-09
ENSG00000087245	MMP2	-6.45591	1.14e-09
ENSG00000182968	SOX1	-10.9804	1.17e-09
ENSG00000101443	WFDC2	-10.9745	1.2e-09
ENSG00000205628	LINC01446	-10.9745	1.2e-09
ENSG00000284669	AC092053.4	10.9701	1.2e-09
ENSG00000258881	AC007040.2	-10.9686	1.23e-09
ENSG00000253767	PCDHGA8	-10.9627	1.26e-09
ENSG00000169436	COL22A1	-10.9567	1.29e-09
ENSG00000166704	ZNF606	-10.9567	1.29e-09
ENSG00000174473	GALNTL6	10.9533	1.29e-09
ENSG00000170873	MTSS1	-6.41844	1.31e-09
ENSG00000250312	ZNF718	-10.9447	1.35e-09
ENSG00000236362	GAGE12F	10.9419	1.35e-09
ENSG00000275113	GAGE2E	10.9419	1.35e-09
ENSG00000163568	AIM2	-10.9386	1.39e-09
ENSG00000215845	TSTD1	-10.9386	1.39e-09
ENSG00000137968	SLC44A5	-10.9386	1.39e-09
ENSG00000175414	ARL10	-6.48776	1.4e-09
ENSG00000124813	RUNX2	-6.47977	1.43e-09
ENSG00000228697	AL023755.1	-10.9265	1.46e-09
ENSG00000183251	OR51B4	10.9247	1.46e-09
ENSG00000234465	PINLYP	-10.9142	1.53e-09
ENSG00000189052	CGB5	-10.9142	1.53e-09
ENSG00000139344	AMDHD1	6.88457	1.53e-09
ENSG00000128710	HOXD10	-10.908	1.57e-09
ENSG00000275874	PICSAR	10.9073	1.57e-09
ENSG00000110328	GALNT18	-6.50202	1.59e-09
ENSG00000248405	PRR5-ARHGAP8	-7.17397	1.6e-09
ENSG00000128394	APOBEC3F	-10.9018	1.61e-09
ENSG00000204516	MICB	10.9014	1.61e-09
ENSG00000285108	AC103718.1	-10.8956	1.65e-09
ENSG00000135333	EPHA7	10.8897	1.69e-09
ENSG00000247134	AC090204.1	-10.883	1.74e-09
ENSG00000149970	CNKSR2	-10.883	1.74e-09
ENSG00000223764	LINC02593	6.55784	1.78e-09
ENSG00000103723	AP3B2	-10.8704	1.83e-09
ENSG00000226674	TEX41	-7.32237	1.85e-09
ENSG00000274750	H3C6	-6.33501	1.85e-09
ENSG00000154545	MAGED4	-10.864	1.88e-09
ENSG00000104267	CA2	-6.7849	1.96e-09
ENSG00000166145	SPINT1	-6.38028	1.97e-09
ENSG00000248449	PCDHGB8P	-10.8448	2.03e-09
ENSG00000234127	TRIM26	-10.8448	2.03e-09
ENSG00000171303	KCNK3	10.8416	2.08e-09
ENSG00000286010	AC108925.1	-10.8383	2.08e-09
ENSG00000244731	C4A	7.50654	2.09e-09
ENSG00000103044	HAS3	-6.40456	2.11e-09
ENSG00000051620	HEBP2	-6.61529	2.21e-09
ENSG00000065923	SLC9A7	-6.56942	2.22e-09
ENSG00000277918	RNVU1-28	-7.08941	2.29e-09
ENSG00000230615	AL139220.2	6.7198	2.29e-09
ENSG00000242908	AADACL2-AS1	-10.8187	2.31e-09
ENSG00000133106	EPSTI1	-10.8187	2.31e-09
ENSG00000122756	CNTFR	10.817	2.31e-09
ENSG00000138311	ZNF365	-6.95543	2.38e-09
ENSG00000153976	HS3ST3A1	-10.7988	2.51e-09
ENSG00000111199	TRPV4	-10.7988	2.51e-09
ENSG00000277883	NLRP3P1	-10.7921	2.58e-09
ENSG00000114812	VIPR1	-10.7921	2.58e-09
ENSG00000189420	ZFP92	-10.7921	2.58e-09
ENSG00000157168	NRG1	-6.23092	2.59e-09
ENSG00000174607	UGT8	-6.93363	2.6e-09
ENSG00000073282	TP63	-6.25645	2.61e-09
ENSG00000136574	GATA4	-10.7854	2.65e-09
ENSG00000162981	LRATD1	-10.7854	2.65e-09
ENSG00000204019	CT83	10.7792	2.65e-09
ENSG00000256146	AC006206.1	-10.7786	2.72e-09
ENSG00000260643	AC092718.3	10.7728	2.72e-09
ENSG00000100985	MMP9	-6.37039	2.76e-09
ENSG00000203778	FAM229B	10.7664	2.8e-09
ENSG00000115232	ITGA4	-6.53028	2.86e-09
ENSG00000166979	EVA1C	6.33987	2.87e-09
ENSG00000178498	DTX3	-6.9115	2.88e-09
ENSG00000128596	CCDC136	-10.765	2.88e-09
ENSG00000047617	ANO2	6.44045	2.92e-09
ENSG00000245648	AC022075.1	-10.7582	2.96e-09
ENSG00000258927	AL133467.2	10.7534	2.96e-09
ENSG00000133477	FAM83F	-6.38183	3.07e-09
ENSG00000188620	HMX3	6.71937	3.09e-09
ENSG00000254101	LINC02055	-10.7444	3.13e-09
ENSG00000278289	CT45A6	10.7404	3.13e-09
ENSG00000184564	SLITRK6	-6.34896	3.13e-09
ENSG00000150995	ITPR1	6.15276	3.13e-09
ENSG00000286169	AHRR	6.18684	3.14e-09
ENSG00000236081	ELFN1-AS1	10.7338	3.22e-09
ENSG00000169252	ADRB2	-6.28644	3.28e-09
ENSG00000131127	ZNF141	-6.47517	3.31e-09
ENSG00000279129	AC046158.3	-10.7304	3.31e-09
ENSG00000184709	LRRC26	10.7272	3.31e-09
ENSG00000222998	RN7SKP259	10.7272	3.31e-09
ENSG00000102854	MSLN	6.15897	3.5e-09
ENSG00000136689	IL1RN	-10.7093	3.6e-09
ENSG00000101276	SLC52A3	-6.85592	3.61e-09
ENSG00000102109	PCSK1N	-10.7022	3.71e-09
ENSG00000107186	MPDZ	-6.46714	3.72e-09
ENSG00000114378	HYAL1	6.26951	3.74e-09
ENSG00000133710	SPINK5	6.11254	3.76e-09
ENSG00000009709	PAX7	-10.695	3.82e-09
ENSG00000268964	ERVV-2	10.6938	3.82e-09
ENSG00000184937	WT1	-10.6878	3.93e-09
ENSG00000115616	SLC9A2	-10.6878	3.93e-09
ENSG00000187918	OR51I2	10.687	3.93e-09
ENSG00000228836	CT45A5	10.687	3.93e-09
ENSG00000197301	HMGA2-AS1	-6.41495	3.95e-09
ENSG00000173040	EVC2	-10.6806	4.05e-09
ENSG00000171488	LRRC8C	-6.20797	4.12e-09
ENSG00000102362	SYTL4	-10.6733	4.17e-09
ENSG00000163909	HEYL	-10.6733	4.17e-09
ENSG00000213030	CGB8	-6.65455	4.29e-09
ENSG00000227619	AL391056.1	10.6664	4.29e-09
ENSG00000149150	SLC43A1	10.6664	4.29e-09
ENSG00000152977	ZIC1	-10.666	4.29e-09
ENSG00000115226	FNDC4	-10.666	4.29e-09
ENSG00000114279	FGF12	6.46416	4.39e-09
ENSG00000184698	OR51M1	10.6595	4.42e-09
ENSG00000099139	PCSK5	-10.6587	4.42e-09
ENSG00000167757	KLK11	-10.6587	4.42e-09
ENSG00000088726	TMEM40	-7.10867	4.54e-09
ENSG00000171124	FUT3	-10.6513	4.55e-09
ENSG00000132563	REEP2	-10.6513	4.55e-09
ENSG00000010219	DYRK4	-7.10157	4.67e-09
ENSG00000171408	PDE7B	6.48794	4.79e-09
ENSG00000146707	POMZP3	10.6386	4.83e-09
ENSG00000226383	LINC01876	-10.6364	4.83e-09
ENSG00000169035	KLK7	-10.6364	4.83e-09
ENSG00000169255	B3GALNT1	-10.6364	4.83e-09
ENSG00000164674	SYTL3	-6.6888	4.97e-09
ENSG00000088992	TESC	10.6315	4.98e-09
ENSG00000171766	GATM	-10.629	4.98e-09
ENSG00000150556	LYPD6B	-10.629	4.98e-09
ENSG00000114923	SLC4A3	-6.90379	4.99e-09
ENSG00000124882	EREG	-10.6214	5.13e-09
ENSG00000184254	ALDH1A3	-6.0214	5.27e-09
ENSG00000116701	NCF2	-6.16628	5.28e-09
ENSG00000165626	BEND7	-10.6139	5.29e-09
ENSG00000256771	ZNF253	10.6101	5.46e-09
ENSG00000198795	ZNF521	10.603	5.63e-09
ENSG00000176165	FOXG1	-10.5986	5.63e-09
ENSG00000124615	MOCS1	-10.5986	5.63e-09
ENSG00000176845	METRNL	6.26405	5.74e-09
ENSG00000109099	PMP22	6.04273	5.81e-09
ENSG00000170775	GPR37	6.18097	5.82e-09
ENSG00000139044	B4GALNT3	-6.86934	5.82e-09
ENSG00000071575	TRIB2	-6.33464	5.97e-09
ENSG00000005001	PRSS22	-10.5909	5.99e-09
ENSG00000164266	SPINK1	10.5885	5.99e-09
ENSG00000103811	CTSH	-6.11469	6.17e-09
ENSG00000113749	HRH2	-10.5832	6.18e-09
ENSG00000133101	CCNA1	-10.5832	6.18e-09
ENSG00000230006	ANKRD36BP2	10.5812	6.18e-09
ENSG00000221963	APOL6	-6.13212	6.31e-09
ENSG00000146411	SLC2A12	-10.5754	6.37e-09
ENSG00000125246	CLYBL	10.5738	6.37e-09
ENSG00000185479	KRT6B	-6.08094	6.47e-09
ENSG00000163235	TGFA	-6.0426	6.54e-09
ENSG00000130413	STK33	-6.61939	6.66e-09
ENSG00000175707	KDF1	-6.70966	6.7e-09
ENSG00000157703	SVOPL	10.559	6.79e-09
ENSG00000171872	KLF17	10.559	6.79e-09
ENSG00000132970	WASF3	-6.82753	6.89e-09
ENSG00000273706	LHX1	-10.5518	7.01e-09
ENSG00000273812	BX640514.2	10.5441	7.01e-09
ENSG00000138347	MYPN	6.92085	7.1e-09
ENSG00000197953	AADACL2	-10.5439	7.24e-09
ENSG00000236609	ZNF853	-10.5439	7.24e-09
ENSG00000157214	STEAP2	-6.68378	7.44e-09
ENSG00000172548	NIPAL4	-10.5359	7.47e-09
ENSG00000100092	SH3BP1	-6.06676	7.55e-09
ENSG00000181143	MUC16	5.948	7.63e-09
ENSG00000134198	TSPAN2	-10.5279	7.72e-09
ENSG00000250305	TRMT9B	10.5214	7.72e-09
ENSG00000101144	BMP7	-6.41241	7.75e-09
ENSG00000143631	FLG	-6.09197	7.89e-09
ENSG00000153162	BMP6	6.12383	7.97e-09
ENSG00000082497	SERTAD4	-10.5198	7.97e-09
ENSG00000139508	SLC46A3	6.17628	8.13e-09
ENSG00000005187	ACSM3	10.5061	8.24e-09
ENSG00000268606	MAGEA2	-6.32487	8.38e-09
ENSG00000050165	DKK3	-6.03124	8.5e-09
ENSG00000275538	RNVU1-19	-10.5035	8.51e-09
ENSG00000058335	RASGRF1	-10.5035	8.51e-09
ENSG00000170396	ZNF804A	10.4983	8.51e-09
ENSG00000197013	ZNF429	10.4983	8.51e-09
ENSG00000170561	IRX2	-6.13556	8.66e-09
ENSG00000200795	RNU4-1	-6.48039	8.88e-09
ENSG00000100055	CYTH4	-10.487	9.1e-09
ENSG00000226887	ERVMER34-1	-10.487	9.1e-09
ENSG00000116962	NID1	-6.2485	9.34e-09
ENSG00000196268	ZNF493	10.4749	9.4e-09
ENSG00000197915	HRNR	-6.46102	9.61e-09
ENSG00000163293	NIPAL1	-6.04294	9.67e-09
ENSG00000181982	CCDC149	-10.4704	9.73e-09
ENSG00000092758	COL9A3	5.96103	9.82e-09
ENSG00000276351	AC004556.4	7.72217	9.86e-09
ENSG00000121769	FABP3	6.08265	9.91e-09
ENSG00000158125	XDH	-6.23309	9.95e-09
ENSG00000272046	AL445647.1	10.459	1.01e-08
ENSG00000118596	SLC16A7	5.98424	1.02e-08
ENSG00000085552	IGSF9	-6.04914	1.04e-08
ENSG00000213022	KLK9	-10.4535	1.04e-08
ENSG00000279993	AC078925.3	10.443	1.08e-08
ENSG00000053918	KCNQ1	6.08341	1.09e-08
ENSG00000154263	ABCA10	-6.3273	1.1e-08
ENSG00000069020	MAST4	-5.96422	1.11e-08
ENSG00000140465	CYP1A1	-6.07634	1.11e-08
ENSG00000105641	SLC5A5	7.10685	1.11e-08
ENSG00000197555	SIPA1L1	-5.91048	1.11e-08
ENSG00000121858	TNFSF10	-6.22455	1.14e-08
ENSG00000151468	CCDC3	-10.4278	1.15e-08
ENSG00000230750	SDAD1P2	-10.4278	1.15e-08
ENSG00000042980	ADAM28	-10.4278	1.15e-08
ENSG00000149557	FEZ1	-6.17593	1.16e-08
ENSG00000135744	AGT	10.4187	1.19e-08
ENSG00000006468	ETV1	6.39434	1.21e-08
ENSG00000167755	KLK6	-6.34988	1.21e-08
ENSG00000095777	MYO3A	-10.4105	1.24e-08
ENSG00000170892	TSEN34	10.4104	1.24e-08
ENSG00000109705	NKX3-2	10.4104	1.24e-08
ENSG00000253706	AC011632.1	-6.68352	1.25e-08
ENSG00000113361	CDH6	-6.68352	1.25e-08
ENSG00000170522	ELOVL6	-6.03522	1.26e-08
ENSG00000166206	GABRB3	10.4022	1.28e-08
ENSG00000164616	FBXL21P	-10.4017	1.28e-08
ENSG00000101825	MXRA5	-5.86758	1.34e-08
ENSG00000106034	CPED1	6.36499	1.36e-08
ENSG00000183092	BEGAIN	5.87402	1.37e-08
ENSG00000250131	AC078881.1	-10.384	1.37e-08
ENSG00000223553	SMPD4P1	-10.384	1.37e-08
ENSG00000104848	KCNA7	-10.3751	1.42e-08
ENSG00000261618	LINC02605	-10.3751	1.42e-08
ENSG00000276612	FP565260.2	6.22458	1.45e-08
ENSG00000121743	GJA3	-10.3661	1.48e-08
ENSG00000286106	AC253572.1	-10.3661	1.48e-08
ENSG00000147883	CDKN2B	6.21785	1.48e-08
ENSG00000110492	MDK	-6.21035	1.55e-08
ENSG00000153246	PLA2R1	-6.50808	1.56e-08
ENSG00000049283	EPN3	-6.50808	1.56e-08
ENSG00000163661	PTX3	-10.348	1.59e-08
ENSG00000263006	ROCK1P1	-10.348	1.59e-08
ENSG00000119888	EPCAM	-5.78032	1.63e-08
ENSG00000249306	LINC01411	7.59619	1.69e-08
ENSG00000286656	AC008875.2	10.3343	1.71e-08
ENSG00000186777	ZNF732	-10.3296	1.71e-08
ENSG00000229647	MYOSLID	-10.3296	1.71e-08
ENSG00000170962	PDGFD	-10.3296	1.71e-08
ENSG00000233012	HDAC1P2	-10.3296	1.71e-08
ENSG00000149948	HMGA2	-5.85909	1.72e-08
ENSG00000132517	SLC52A1	-10.3203	1.77e-08
ENSG00000171587	DSCAM	-10.3203	1.77e-08
ENSG00000267121	AC008105.3	6.51269	1.8e-08
ENSG00000276122	AC026336.3	6.29596	1.82e-08
ENSG00000116741	RGS2	5.74394	1.83e-08
ENSG00000151572	ANO4	10.3169	1.84e-08
ENSG00000250786	SNHG18	-10.311	1.84e-08
ENSG00000189369	GSPT2	-10.311	1.84e-08
ENSG00000138675	FGF5	-10.311	1.84e-08
ENSG00000147100	SLC16A2	-6.05897	1.9e-08
ENSG00000206077	ZDHHC11B	10.308	1.91e-08
ENSG00000163689	C3orf67	-6.23961	1.94e-08
ENSG00000253953	PCDHGB4	-7.05089	1.95e-08
ENSG00000168916	ZNF608	-6.09396	1.97e-08
ENSG00000251620	STPG2-AS1	-10.3016	1.98e-08
ENSG00000246090	AP002026.1	-10.3016	1.98e-08
ENSG00000174171	AC020659.1	-10.3016	1.98e-08
ENSG00000250564	AC109454.3	-10.2922	2.06e-08
ENSG00000114405	C3orf14	-6.73912	2.13e-08
ENSG00000179178	TMEM125	-10.2826	2.14e-08
ENSG00000198796	ALPK2	6.01183	2.18e-08
ENSG00000286733	AC090164.5	10.2631	2.22e-08
ENSG00000225684	FAM225B	10.2631	2.22e-08
ENSG00000287778	AC006230.1	-10.2634	2.31e-08
ENSG00000275661	AC004556.2	10.254	2.31e-08
ENSG00000235297	FAUP1	-6.71139	2.38e-08
ENSG00000099337	KCNK6	-6.00434	2.39e-08
ENSG00000253313	C1orf210	-10.2537	2.4e-08
ENSG00000244122	UGT1A7	-10.2537	2.4e-08
ENSG00000167103	PIP5KL1	10.2448	2.4e-08
ENSG00000067798	NAV3	-5.8008	2.41e-08
ENSG00000104177	MYEF2	-6.40271	2.42e-08
ENSG00000280217	AC126564.1	6.91827	2.44e-08
ENSG00000250365	AL139353.2	-10.2439	2.49e-08
ENSG00000088386	SLC15A1	-10.2439	2.49e-08
ENSG00000170837	GPR27	-10.2439	2.49e-08
ENSG00000162444	RBP7	-10.2439	2.49e-08
ENSG00000109101	FOXN1	5.9773	2.51e-08
ENSG00000007372	PAX6	6.61336	2.52e-08
ENSG00000117407	ARTN	-5.76173	2.55e-08
ENSG00000180257	ZNF816	6.6089	2.57e-08
ENSG00000144893	MED12L	-10.2341	2.59e-08
ENSG00000249196	TMEM132D-AS1	10.2262	2.59e-08
ENSG00000166535	A2ML1	-6.68786	2.62e-08
ENSG00000101955	SRPX	-6.50325	2.68e-08
ENSG00000284431	AL022238.4	-10.2242	2.7e-08
ENSG00000175040	CHST2	5.88177	2.8e-08
ENSG00000006377	DLX6	-10.2142	2.81e-08
ENSG00000112761	CCN6	-10.2142	2.81e-08
ENSG00000157445	CACNA2D3	6.88067	2.86e-08
ENSG00000161243	FBXO27	-5.73516	2.91e-08
ENSG00000169860	P2RY1	-10.2042	2.92e-08
ENSG00000236107	SCN1A-AS1	-10.2042	2.92e-08
ENSG00000251169	LINC01843	10.1978	2.92e-08
ENSG00000239828	AC063944.1	10.1978	2.92e-08
ENSG00000171903	CYP4F11	-10.1941	3.04e-08
ENSG00000236675	MTX1P1	-10.1941	3.04e-08
ENSG00000250869	AC087359.1	-10.1941	3.04e-08
ENSG00000198865	CCDC152	-10.1941	3.04e-08
ENSG00000165816	VWA2	-6.34148	3.09e-08
ENSG00000236924	AL162411.1	10.1786	3.17e-08
ENSG00000183395	PMCH	10.1786	3.17e-08
ENSG00000175556	LONRF3	5.89329	3.2e-08
ENSG00000154310	TNIK	-10.1736	3.3e-08
ENSG00000233013	FAM157B	-10.1736	3.3e-08
ENSG00000205277	MUC12	10.1689	3.3e-08
ENSG00000240541	TM4SF1-AS1	10.1689	3.3e-08
ENSG00000080007	DDX43	-10.1633	3.44e-08
ENSG00000214336	FOXI3	-10.1633	3.44e-08
ENSG00000189221	MAOA	-5.96054	3.44e-08
ENSG00000169884	WNT10B	5.60919	3.48e-08
ENSG00000119866	BCL11A	-6.05216	3.49e-08
ENSG00000242193	CRYZL2P	-10.1529	3.58e-08
ENSG00000274847	MAFIP	10.1493	3.58e-08
ENSG00000271334	LINC02104	10.1493	3.58e-08
ENSG00000138759	FRAS1	-5.73833	3.61e-08
ENSG00000278704	BX004987.1	6.52147	3.73e-08
ENSG00000133863	TEX15	-10.1424	3.74e-08
ENSG00000243766	HOTTIP	10.1394	3.74e-08
ENSG00000072422	RHOBTB1	5.60594	3.76e-08
ENSG00000259692	AC104041.1	-6.59984	3.81e-08
ENSG00000163735	CXCL5	-10.1318	3.89e-08
ENSG00000278530	CHMP1B2P	-10.1318	3.89e-08
ENSG00000225431	LINC01671	10.1294	3.89e-08
ENSG00000041982	TNC	-5.55306	3.9e-08
ENSG00000286070	GGT1	-6.58972	3.97e-08
ENSG00000125850	OVOL2	-6.58972	3.97e-08
ENSG00000170745	KCNS3	-5.86287	3.98e-08
ENSG00000254266	PKIA-AS1	-10.1212	4.06e-08
ENSG00000184719	RNLS	-10.1212	4.06e-08
ENSG00000109511	ANXA10	-10.1212	4.06e-08
ENSG00000124253	PCK1	10.1193	4.06e-08
ENSG00000139629	GALNT6	-6.39291	4.18e-08
ENSG00000287271	AC011455.6	-10.1105	4.24e-08
ENSG00000270470	AC064872.1	-10.1105	4.24e-08
ENSG00000231298	MANCR	-10.1105	4.24e-08
ENSG00000262209	PCDHGB3	-10.1105	4.24e-08
ENSG00000102271	KLHL4	-10.1105	4.24e-08
ENSG00000213793	ZNF888	6.47813	4.4e-08
ENSG00000276545	PCDHGB9P	-10.0997	4.42e-08
ENSG00000253819	LINC01151	-10.0997	4.42e-08
ENSG00000237713	AC011287.2	-10.0997	4.42e-08
ENSG00000168394	TAP1	10.099	4.42e-08
ENSG00000206652	RNU1-1	-5.52903	4.52e-08
ENSG00000179222	MAGED1	-5.65276	4.54e-08
ENSG00000235098	ANKRD65	-6.37069	4.57e-08
ENSG00000270025	BMS1P7	-10.0888	4.62e-08
ENSG00000101230	ISM1	-10.0888	4.62e-08
ENSG00000204789	ZNF204P	-10.0888	4.62e-08
ENSG00000107331	ABCA2	5.51414	4.65e-08
ENSG00000048540	LMO3	-6.54852	4.68e-08
ENSG00000134762	DSC3	-5.51985	4.71e-08
ENSG00000177374	HIC1	6.7557	4.75e-08
ENSG00000172687	ZNF738	10.0784	4.82e-08
ENSG00000273333	AL662884.1	-10.0778	4.82e-08
ENSG00000230267	HERC2P4	-10.0778	4.82e-08
ENSG00000197043	ANXA6	5.51404	5e-08
ENSG00000249478	AC010307.3	10.068	5.04e-08
ENSG00000174482	LINGO2	10.068	5.04e-08
ENSG00000181333	HEPHL1	-5.66979	5.08e-08
ENSG00000166920	C15orf48	-6.52215	5.2e-08
ENSG00000196352	CD55	5.4736	5.21e-08
ENSG00000101493	ZNF516	-5.85769	5.25e-08
ENSG00000237412	PRSS56	10.0576	5.26e-08
ENSG00000251138	AC090015.1	10.0576	5.26e-08
ENSG00000145476	CYP4V2	-10.0557	5.26e-08
ENSG00000254122	PCDHGB7	-6.51682	5.32e-08
ENSG00000139192	TAPBPL	-6.21063	5.32e-08
ENSG00000144063	MALL	-5.62897	5.37e-08
ENSG00000175745	NR2F1	5.64165	5.37e-08
ENSG00000166147	FBN1	5.47674	5.43e-08
ENSG00000139926	FRMD6	-5.48681	5.44e-08
ENSG00000274276	CBSL	10.047	5.5e-08
ENSG00000261804	AC007342.4	-10.0444	5.5e-08
ENSG00000167680	SEMA6B	-5.6483	5.54e-08
ENSG00000155974	GRIP1	-5.86873	5.64e-08
ENSG00000134716	CYP2J2	-10.0331	5.75e-08
ENSG00000162745	OLFML2B	6.00905	5.98e-08
ENSG00000226539	AC012512.1	-10.0217	6.01e-08
ENSG00000260832	AC125793.1	-10.0217	6.01e-08
ENSG00000157927	RADIL	-10.0217	6.01e-08
ENSG00000243629	LINC00880	-10.0217	6.01e-08
ENSG00000245552	AP000787.1	-10.0217	6.01e-08
ENSG00000196917	HCAR1	-6.17803	6.16e-08
ENSG00000153071	DAB2	5.44941	6.17e-08
ENSG00000054179	ENTPD2	10.0148	6.29e-08
ENSG00000286337	AC025370.2	-10.0103	6.29e-08
ENSG00000011465	DCN	5.56349	6.33e-08
ENSG00000227082	LINC02798	10.004	6.59e-08
ENSG00000262714	AC007342.5	-9.99869	6.59e-08
ENSG00000121440	PDZRN3	-9.99869	6.59e-08
ENSG00000184058	TBX1	5.54763	6.62e-08
ENSG00000154736	ADAMTS5	5.72981	6.72e-08
ENSG00000259583	AC015712.2	-5.45106	6.84e-08
ENSG00000162804	SNED1	5.45464	6.86e-08
ENSG00000140795	MYLK3	5.49796	6.89e-08
ENSG00000250284	AC109439.2	9.99301	6.89e-08
ENSG00000281566	AL157778.1	9.99301	6.89e-08
ENSG00000132003	ZSWIM4	-9.98702	6.89e-08
ENSG00000274333	CU633967.1	-9.98702	6.89e-08
ENSG00000253102	AC004707.2	9.98196	7.22e-08
ENSG00000260289	AC093515.1	9.98196	7.22e-08
ENSG00000237880	LINC01885	9.98196	7.22e-08
ENSG00000261104	AC093904.4	-9.97525	7.22e-08
ENSG00000240225	ZNF542P	-9.97525	7.22e-08
ENSG00000286966	AL137800.1	-5.92025	7.26e-08
ENSG00000140284	SLC27A2	5.66912	7.33e-08
ENSG00000125954	CHURC1-FNTB	9.97084	7.56e-08
ENSG00000239713	APOBEC3G	-9.96339	7.56e-08
ENSG00000215386	MIR99AHG	5.95276	7.6e-08
ENSG00000159674	SPON2	5.46663	7.61e-08
ENSG00000258659	TRIM34	-7.30364	7.61e-08
ENSG00000254632	AP003119.1	9.95962	7.93e-08
ENSG00000180190	TDRP	-6.11486	7.94e-08
ENSG00000235374	SSR4P1	6.32891	8.28e-08
ENSG00000281131	SCHLAP1	-9.95143	8.31e-08
ENSG00000288098	AL031073.2	9.94832	8.31e-08
ENSG00000152377	SPOCK1	-5.54057	8.44e-08
ENSG00000207005	RNU1-2	-5.40003	8.47e-08
ENSG00000263020	AL662899.4	-5.73988	8.59e-08
ENSG00000133134	BEX2	-9.93937	8.72e-08
ENSG00000006042	TMEM98	-9.93937	8.72e-08
ENSG00000152463	OLAH	9.93692	8.72e-08
ENSG00000188162	OTOG	9.93692	8.72e-08
ENSG00000269825	AC022150.4	5.84824	8.76e-08
ENSG00000261040	WFDC21P	5.64906	8.84e-08
ENSG00000158050	DUSP2	5.83826	9.02e-08
ENSG00000260228	AC009119.1	-9.92721	9.14e-08
ENSG00000129993	CBFA2T3	9.92544	9.14e-08
ENSG00000164742	ADCY1	-5.52789	9.16e-08
ENSG00000169432	SCN9A	-5.56745	9.29e-08
ENSG00000127585	FBXL16	5.41283	9.37e-08
ENSG00000167588	GPD1	9.91386	9.6e-08
ENSG00000231742	LINC01273	9.91386	9.6e-08
ENSG00000273173	SNURF	7.16883	9.7e-08
ENSG00000029534	ANK1	-5.36434	9.75e-08
ENSG00000162738	VANGL2	-5.72796	1e-07
ENSG00000252699	SNORA21B	-6.65403	1e-07
ENSG00000151612	ZNF827	-5.48094	1.01e-07
ENSG00000174500	GCSAM	-9.90257	1.01e-07
ENSG00000215018	COL28A1	-9.90257	1.01e-07
ENSG00000012223	LTF	9.89043	1.01e-07
ENSG00000157399	ARSL	5.48653	1.02e-07
ENSG00000112559	MDFI	-5.38507	1.03e-07
ENSG00000273906	AC011297.1	-9.89009	1.06e-07
ENSG00000227764	LINC01693	9.87857	1.06e-07
ENSG00000134121	CHL1	9.87857	1.06e-07
ENSG00000127920	GNG11	5.38766	1.08e-07
ENSG00000117228	GBP1	-5.63748	1.09e-07
ENSG00000158156	XKR8	-5.9415	1.11e-07
ENSG00000286890	AC055840.1	-9.8775	1.11e-07
ENSG00000288062	AL136981.3	-9.8775	1.11e-07
ENSG00000137959	IFI44L	-9.8775	1.11e-07
ENSG00000233532	LINC00460	-9.8775	1.11e-07
ENSG00000186493	C5orf38	-9.8775	1.11e-07
ENSG00000171435	KSR2	-9.8775	1.11e-07
ENSG00000074803	SLC12A1	9.86661	1.11e-07
ENSG00000143850	PLEKHA6	5.33793	1.14e-07
ENSG00000261183	SPINT1-AS1	-9.86481	1.17e-07
ENSG00000227496	AC099066.2	-9.86481	1.17e-07
ENSG00000153993	SEMA3D	-9.86481	1.17e-07
ENSG00000186642	PDE2A	5.77339	1.19e-07
ENSG00000173705	SUSD5	-5.92516	1.2e-07
ENSG00000130038	CRACR2A	-6.01229	1.22e-07
ENSG00000090339	ICAM1	5.33865	1.22e-07
ENSG00000268940	CT45A1	9.84238	1.23e-07
ENSG00000269837	IPO5P1	5.66286	1.23e-07
ENSG00000105699	LSR	-5.32411	1.26e-07
ENSG00000120833	SOCS2	-5.41917	1.28e-07
ENSG00000115363	EVA1A	-5.99835	1.29e-07
ENSG00000250722	SELENOP	5.61504	1.29e-07
ENSG00000205754	SLCO1B7	-9.83907	1.29e-07
ENSG00000064225	ST3GAL6	-9.83907	1.29e-07
ENSG00000275325	PDCD6IPP1	9.83012	1.29e-07
ENSG00000272347	AC116351.2	9.83012	1.29e-07
ENSG00000165238	WNK2	-5.73094	1.31e-07
ENSG00000163032	VSNL1	-5.5933	1.31e-07
ENSG00000177822	TENM3-AS1	-9.82603	1.36e-07
ENSG00000254842	LINC02551	-9.82603	1.36e-07
ENSG00000114771	AADAC	-9.82603	1.36e-07
ENSG00000223813	AC007255.1	9.81775	1.36e-07
ENSG00000015413	DPEP1	9.81775	1.36e-07
ENSG00000069702	TGFBR3	5.26288	1.38e-07
ENSG00000165949	IFI27	-5.39613	1.38e-07
ENSG00000147202	DIAPH2	-5.43518	1.38e-07
ENSG00000168389	MFSD2A	-5.47022	1.38e-07
ENSG00000271795	AC011337.1	-6.10058	1.4e-07
ENSG00000138792	ENPEP	-9.81287	1.43e-07
ENSG00000233844	KCNQ5-IT1	-9.81287	1.43e-07
ENSG00000214429	CYCSP6	-9.81287	1.43e-07
ENSG00000177984	LCN15	9.80527	1.43e-07
ENSG00000136305	CIDEB	9.80527	1.43e-07
ENSG00000277837	AC090340.1	9.80527	1.43e-07
ENSG00000107099	DOCK8	5.32979	1.49e-07
ENSG00000116761	CTH	5.25177	1.5e-07
ENSG00000183578	TNFAIP8L3	-9.79959	1.51e-07
ENSG00000214435	AS3MT	-9.79959	1.51e-07
ENSG00000065675	PRKCQ	-9.79959	1.51e-07
ENSG00000187566	NHLRC1	-9.79959	1.51e-07
ENSG00000131400	NAPSA	-9.79959	1.51e-07
ENSG00000233327	USP32P2	9.79269	1.51e-07
ENSG00000273696	CT45A7	9.79269	1.51e-07
ENSG00000184811	TRARG1	9.79269	1.51e-07
ENSG00000207513	RNU1-3	-5.2401	1.51e-07
ENSG00000285043	AC093512.2	5.28051	1.55e-07
ENSG00000185100	ADSS1	5.44262	1.57e-07
ENSG00000158023	WDR66	-5.32723	1.59e-07
ENSG00000249690	AC110813.1	-9.78618	1.59e-07
ENSG00000130054	FAM155B	-9.78618	1.59e-07
ENSG00000121207	LRAT	-9.78618	1.59e-07
ENSG00000137747	TMPRSS13	-9.78618	1.59e-07
ENSG00000168785	TSPAN5	-5.32898	1.6e-07
ENSG00000120708	TGFBI	-5.19082	1.65e-07
ENSG00000115718	PROC	-9.77265	1.68e-07
ENSG00000140459	CYP11A1	9.76718	1.68e-07
ENSG00000281406	BLACAT1	-5.66639	1.72e-07
ENSG00000167191	GPRC5B	-5.66639	1.72e-07
ENSG00000153404	PLEKHG4B	-5.35506	1.73e-07
ENSG00000136869	TLR4	5.74886	1.74e-07
ENSG00000167232	ZNF91	5.31262	1.75e-07
ENSG00000232788	ITGA6-AS1	-9.75899	1.77e-07
ENSG00000254709	IGLL5	-9.75899	1.77e-07
ENSG00000125266	EFNB2	-5.21595	1.8e-07
ENSG00000148204	CRB2	5.5686	1.82e-07
ENSG00000278384	AL354822.1	5.82596	1.85e-07
ENSG00000154165	GPR15	-9.7452	1.87e-07
ENSG00000248424	OR51K1P	9.74122	1.87e-07
ENSG00000137491	SLCO2B1	6.12548	1.91e-07
ENSG00000256115	LINC02443	-9.73128	1.97e-07
ENSG00000246731	AC100786.1	-9.73128	1.97e-07
ENSG00000100628	ASB2	-9.73128	1.97e-07
ENSG00000131152	AC010531.1	9.72806	1.97e-07
ENSG00000224361	AC011239.1	9.72806	1.97e-07
ENSG00000185885	IFITM1	-5.22433	2e-07
ENSG00000207389	RNU1-4	-5.18407	2.06e-07
ENSG00000244457	ENO1P1	-7.06126	2.06e-07
ENSG00000236104	ZBTB22	-9.71722	2.08e-07
ENSG00000196368	NUDT11	-9.71722	2.08e-07
ENSG00000256450	AC007552.1	-9.71722	2.08e-07
ENSG00000176641	RNF152	-5.26397	2.1e-07
ENSG00000076706	MCAM	5.12988	2.17e-07
ENSG00000143184	XCL1	-9.70302	2.2e-07
ENSG00000118004	COLEC11	-9.70302	2.2e-07
ENSG00000248734	AC008906.1	-9.70302	2.2e-07
ENSG00000184599	TAFA3	-9.70302	2.2e-07
ENSG00000282907	Z98883.1	9.70137	2.2e-07
ENSG00000163814	CDCP1	-5.13896	2.23e-07
ENSG00000185352	HS6ST3	6.08112	2.24e-07
ENSG00000007306	CEACAM7	6.07466	2.3e-07
ENSG00000198947	DMD	5.13899	2.31e-07
ENSG00000206596	RNU1-27P	-5.17686	2.32e-07
ENSG00000276170	AC244153.1	-9.68869	2.32e-07
ENSG00000099953	MMP11	-9.68869	2.32e-07
ENSG00000179148	ALOXE3	-9.68869	2.32e-07
ENSG00000253385	AP003696.1	-9.68869	2.32e-07
ENSG00000286015	CR589904.2	9.68784	2.32e-07
ENSG00000248607	AC117422.1	9.68784	2.32e-07
ENSG00000176728	TTTY14	-6.44716	2.35e-07
ENSG00000141526	SLC16A3	5.12432	2.35e-07
ENSG00000253731	PCDHGA6	-5.85107	2.36e-07
ENSG00000078081	LAMP3	-5.46598	2.42e-07
ENSG00000118971	CCND2	-5.23914	2.45e-07
ENSG00000232759	AC002480.1	-9.6742	2.46e-07
ENSG00000175746	C15orf54	-9.6742	2.46e-07
ENSG00000272141	AL390719.2	-9.6742	2.46e-07
ENSG00000284428	AC092329.4	5.86706	2.57e-07
ENSG00000164089	ETNPPL	9.66039	2.6e-07
ENSG00000256982	AC135782.1	9.66039	2.6e-07
ENSG00000278991	AC090181.3	-9.65957	2.6e-07
ENSG00000185607	ACTBP7	-9.65957	2.6e-07
ENSG00000287929	AL354953.1	-9.65957	2.6e-07
ENSG00000115468	EFHD1	5.64611	2.64e-07
ENSG00000167363	FN3K	5.32709	2.67e-07
ENSG00000275405	AC213203.2	-5.10275	2.74e-07
ENSG00000275945	EIF3FP1	5.63721	2.74e-07
ENSG00000261706	LINC00165	9.64647	2.75e-07
ENSG00000203618	GP1BB	9.64647	2.75e-07
ENSG00000105852	PON3	-9.6448	2.75e-07
ENSG00000185652	NTF3	-9.6448	2.75e-07
ENSG00000166923	GREM1	-9.6448	2.75e-07
ENSG00000280190	AC027279.4	-9.6448	2.75e-07
ENSG00000182040	USH1G	-9.6448	2.75e-07
ENSG00000149054	ZNF215	-9.6448	2.75e-07
ENSG00000173482	PTPRM	5.13302	2.77e-07
ENSG00000280080	TBC1D22A-AS1	-6.11264	2.78e-07
ENSG00000152402	GUCY1A2	5.21199	2.83e-07
ENSG00000267924	AC139769.2	6.02199	2.86e-07
ENSG00000173535	TNFRSF10C	5.83851	2.9e-07
ENSG00000283703	VSIG10L2	9.63241	2.92e-07
ENSG00000168427	KLHL30	9.63241	2.92e-07
ENSG00000064692	SNCAIP	-9.62986	2.92e-07
ENSG00000174837	ADGRE1	-9.62986	2.92e-07
ENSG00000279548	AL022323.4	-9.62986	2.92e-07
ENSG00000166394	CYB5R2	-9.62986	2.92e-07
ENSG00000145675	PIK3R1	-5.21361	2.93e-07
ENSG00000169991	IFFO2	-5.07512	2.93e-07
ENSG00000162836	ACP6	-5.21848	2.98e-07
ENSG00000198121	LPAR1	-5.49314	3e-07
ENSG00000286133	AC093817.2	9.61822	3.09e-07
ENSG00000256810	AC078925.1	9.61822	3.09e-07
ENSG00000181609	OR52D1	9.61822	3.09e-07
ENSG00000229154	KCNQ5-AS1	-9.61478	3.09e-07
ENSG00000240764	PCDHGC5	-9.61478	3.09e-07
ENSG00000242419	PCDHGC4	-9.61478	3.09e-07
ENSG00000253873	PCDHGA11	-5.78226	3.1e-07
ENSG00000114646	CSPG5	5.43365	3.16e-07
ENSG00000109072	VTN	5.29987	3.16e-07
ENSG00000165905	LARGE2	-5.41861	3.2e-07
ENSG00000139278	GLIPR1	-5.10075	3.21e-07
ENSG00000134955	SLC37A2	-5.21929	3.26e-07
ENSG00000204529	GUCY2EP	9.60388	3.28e-07
ENSG00000254349	MIR2052HG	-9.59953	3.28e-07
ENSG00000084453	SLCO1A2	-9.59953	3.28e-07
ENSG00000184226	PCDH9	-5.19041	3.34e-07
ENSG00000170500	LONRF2	-5.76041	3.38e-07
ENSG00000249628	LINC00942	5.29741	3.42e-07
ENSG00000146592	CREB5	-5.53811	3.47e-07
ENSG00000154227	CERS3	-9.58412	3.48e-07
ENSG00000258932	AL390334.1	-9.58412	3.48e-07
ENSG00000280208	GGT4P	-9.58412	3.48e-07
ENSG00000227906	SNAP25-AS1	-9.58412	3.48e-07
ENSG00000255666	LINC02700	-9.58412	3.48e-07
ENSG00000112796	ENPP5	-9.58412	3.48e-07
ENSG00000165795	NDRG2	-5.49487	3.5e-07
ENSG00000011201	ANOS1	5.10893	3.5e-07
ENSG00000048740	CELF2	5.17679	3.66e-07
ENSG00000090534	THPO	9.57477	3.69e-07
ENSG00000233392	AC104809.2	9.57477	3.69e-07
ENSG00000254560	BBOX1-AS1	-9.56854	3.69e-07
ENSG00000108771	DHX58	-9.56854	3.69e-07
ENSG00000274173	AL035661.1	-9.56854	3.69e-07
ENSG00000124875	CXCL6	-9.56854	3.69e-07
ENSG00000231346	LINC01160	-9.56854	3.69e-07
ENSG00000286048	AC008966.3	-9.56854	3.69e-07
ENSG00000237807	AC022034.1	-9.56854	3.69e-07
ENSG00000243403	AC090543.3	-9.56854	3.69e-07
ENSG00000119681	LTBP2	-5.1243	3.76e-07
ENSG00000145287	PLAC8	5.30065	3.91e-07
ENSG00000278905	AC106818.1	9.55999	3.93e-07
ENSG00000278962	AC092645.1	9.55999	3.93e-07
ENSG00000236627	AL590302.2	9.55999	3.93e-07
ENSG00000268108	AC008687.2	-9.5528	3.93e-07
ENSG00000180155	LYNX1	-9.5528	3.93e-07
ENSG00000242732	RTL5	-9.5528	3.93e-07
ENSG00000286403	AC010378.2	-9.5528	3.93e-07
ENSG00000113594	LIFR	4.97962	4.02e-07
ENSG00000186907	RTN4RL2	5.11191	4.07e-07
ENSG00000152689	RASGRP3	5.93206	4.17e-07
ENSG00000224055	GAPDHP55	-9.53688	4.17e-07
ENSG00000269918	AF131215.6	-9.53688	4.17e-07
ENSG00000169896	ITGAM	-9.53688	4.17e-07
ENSG00000242147	LINC02657	-9.53688	4.17e-07
ENSG00000132854	KANK4	-9.53688	4.17e-07
ENSG00000169071	ROR2	5.00573	4.22e-07
ENSG00000273768	RNVU1-29	-5.00824	4.26e-07
ENSG00000144821	MYH15	-5.69856	4.41e-07
ENSG00000099822	HCN2	5.04279	4.42e-07
ENSG00000124203	ZNF831	9.52998	4.44e-07
ENSG00000166896	ATP23	9.52998	4.44e-07
ENSG00000105996	HOXA2	-9.52078	4.44e-07
ENSG00000100433	KCNK10	-9.52078	4.44e-07
ENSG00000169548	ZNF280A	-9.52078	4.44e-07
ENSG00000166349	RAG1	-5.69281	4.51e-07
ENSG00000258529	AP001781.2	9.51473	4.72e-07
ENSG00000100678	SLC8A3	9.51473	4.72e-07
ENSG00000243135	UGT1A3	-9.5045	4.72e-07
ENSG00000124343	XG	-9.5045	4.72e-07
ENSG00000269984	AC078795.1	-5.08989	4.86e-07
ENSG00000237440	ZNF737	9.49932	5.03e-07
ENSG00000279012	OR51B2	9.49932	5.03e-07
ENSG00000215262	KCNU1	9.49932	5.03e-07
ENSG00000225492	GBP1P1	-9.48803	5.03e-07
ENSG00000273045	C2orf15	-9.48803	5.03e-07
ENSG00000173597	SULT1B1	-9.48803	5.03e-07
ENSG00000279296	PRAL	-5.78824	5.05e-07
ENSG00000171056	SOX7	-5.13154	5.31e-07
ENSG00000228340	MIR646HG	9.48375	5.36e-07
ENSG00000284526	AC015802.6	-5.38684	5.37e-07
ENSG00000050555	LAMC3	4.99535	5.46e-07
ENSG00000255874	LINC00346	5.08623	5.47e-07
ENSG00000213694	S1PR3	-5.26545	5.48e-07
ENSG00000169894	MUC3A	5.33685	5.63e-07
ENSG00000204860	FAM201A	-9.47138	5.72e-07
ENSG00000273274	ZBTB8B	-9.47138	5.72e-07
ENSG00000162069	BICDL2	-9.47138	5.72e-07
ENSG00000144583	MARCHF4	-9.47138	5.72e-07
ENSG00000251354	AC024451.1	-9.47138	5.72e-07
ENSG00000159374	M1AP	9.468	5.72e-07
ENSG00000213801	ZNF321P	9.468	5.72e-07
ENSG00000184922	FMNL1	4.9366	5.8e-07
ENSG00000101986	ABCD1	4.91549	5.82e-07
ENSG00000101846	STS	4.90709	5.83e-07
ENSG00000276600	RAB7B	-5.26959	5.91e-07
ENSG00000198934	MAGEE1	-5.74743	5.93e-07
ENSG00000188293	IGFL1	-9.45453	6.1e-07
ENSG00000253972	MAL2-AS1	-9.45453	6.1e-07
ENSG00000149043	SYT8	-9.45453	6.1e-07
ENSG00000164796	CSMD3	-9.45453	6.1e-07
ENSG00000167360	OR51Q1	9.45208	6.1e-07
ENSG00000254416	LINC02732	9.43599	6.1e-07
ENSG00000188761	BCL2L15	5.43119	6.36e-07
ENSG00000157510	AFAP1L1	-5.02208	6.4e-07
ENSG00000240990	HOXA11-AS	5.25773	6.51e-07
ENSG00000141040	ZNF287	-9.43748	6.51e-07
ENSG00000231183	AC007003.1	-9.43748	6.51e-07
ENSG00000115009	CCL20	-9.43748	6.51e-07
ENSG00000266910	AC008507.1	-9.43748	6.51e-07
ENSG00000128242	GAL3ST1	9.41971	6.51e-07
ENSG00000222033	LINC01124	9.41971	6.51e-07
ENSG00000188747	NOXA1	5.42085	6.64e-07
ENSG00000160229	ZNF66	6.09812	6.77e-07
ENSG00000165556	CDX2	-9.42023	6.96e-07
ENSG00000285238	AC006064.6	-9.42023	6.96e-07
ENSG00000232229	LINC00865	-9.42023	6.96e-07
ENSG00000253522	MIR3142HG	-9.42023	6.96e-07
ENSG00000285628	AC126755.7	-9.42023	6.96e-07
ENSG00000159173	TNNI1	-9.42023	6.96e-07
ENSG00000196565	HBG2	9.40325	6.96e-07
ENSG00000247095	MIR210HG	9.40325	6.96e-07
ENSG00000169583	CLIC3	5.11916	7.04e-07
ENSG00000263426	RN7SL471P	-5.88331	7.06e-07
ENSG00000105639	JAK3	5.10768	7.38e-07
ENSG00000078018	MAP2	-5.30865	7.43e-07
ENSG00000150893	FREM2	-9.40276	7.44e-07
ENSG00000163209	SPRR3	-9.40276	7.44e-07
ENSG00000258018	LINC02457	-9.40276	7.44e-07
ENSG00000142623	PADI1	-9.40276	7.44e-07
ENSG00000157851	DPYSL5	-9.40276	7.44e-07
ENSG00000214822	KRT16P3	-9.40276	7.44e-07
ENSG00000116194	ANGPTL1	-9.40276	7.44e-07
ENSG00000161149	TUBA3FP	-9.40276	7.44e-07
ENSG00000258537	FRMD6-AS2	-9.40276	7.44e-07
ENSG00000152292	SH2D6	9.38659	7.44e-07
ENSG00000139144	PIK3C2G	-5.04525	7.87e-07
ENSG00000271647	KRT8P47	6.06018	7.91e-07
ENSG00000237238	BMS1P10	-9.38509	7.96e-07
ENSG00000248370	LINC02434	-9.38509	7.96e-07
ENSG00000287543	AC013486.1	-9.38509	7.96e-07
ENSG00000183760	ACP7	-9.38509	7.96e-07
ENSG00000253746	AC091182.2	-9.38509	7.96e-07
ENSG00000018869	ZNF582	-9.38509	7.96e-07
ENSG00000234424	AL353743.4	5.76582	8.04e-07
ENSG00000178078	STAP2	-4.98401	8.06e-07
ENSG00000165078	CPA6	-5.28304	8.21e-07
ENSG00000157111	TMEM171	-9.36719	8.52e-07
ENSG00000262503	AC027763.1	-9.36719	8.52e-07
ENSG00000266921	AC006213.1	9.3527	8.52e-07
ENSG00000273003	ARL2-SNX15	9.3527	8.52e-07
ENSG00000277991	FP236241.2	9.3527	8.52e-07
ENSG00000266642	AC024267.7	9.3527	8.52e-07
ENSG00000138483	CCDC54	9.3527	8.52e-07
ENSG00000109193	SULT1E1	-5.83272	8.59e-07
ENSG00000198105	ZNF248	5.04695	8.64e-07
ENSG00000200354	SNORA71D	-6.11515	8.91e-07
ENSG00000288101	AL359987.1	-9.34907	9.13e-07
ENSG00000278561	PTPN20CP	-9.34907	9.13e-07
ENSG00000287106	AC106743.1	-9.34907	9.13e-07
ENSG00000119411	BSPRY	-9.34907	9.13e-07
ENSG00000260914	AC026464.4	9.33544	9.13e-07
ENSG00000242759	LINC00882	9.33544	9.13e-07
ENSG00000157992	KRTCAP3	-5.18659	9.26e-07
ENSG00000213949	ITGA1	4.80253	9.3e-07
ENSG00000033122	LRRC7	-5.15387	9.45e-07
ENSG00000247199	AC011346.1	4.79632	9.49e-07
ENSG00000169403	PTAFR	-5.15033	9.58e-07
ENSG00000157551	KCNJ15	-5.12221	9.75e-07
ENSG00000047936	ROS1	-9.33072	9.8e-07
ENSG00000280027	AC007342.9	-9.33072	9.8e-07
ENSG00000161405	IKZF3	-9.33072	9.8e-07
ENSG00000198417	MT1F	-9.33072	9.8e-07
ENSG00000256083	AC090673.1	-9.33072	9.8e-07
ENSG00000249967	AL355315.1	9.31798	9.8e-07
ENSG00000249207	AC079921.1	-5.61758	9.84e-07
ENSG00000023171	GRAMD1B	4.80009	1.01e-06
ENSG00000204131	NHSL2	-5.19625	1.01e-06
ENSG00000099984	GSTT2	-9.31214	1.05e-06
ENSG00000173253	DMRT2	-9.31214	1.05e-06
ENSG00000220908	LINC02531	-9.31214	1.05e-06
ENSG00000279588	AC087762.2	-9.31214	1.05e-06
ENSG00000197016	ZNF470	-9.31214	1.05e-06
ENSG00000185736	ADARB2	-9.31214	1.05e-06
ENSG00000254788	CKLF-CMTM1	-9.31214	1.05e-06
ENSG00000255491	AC100858.3	-9.31214	1.05e-06
ENSG00000228705	LINC00659	9.30031	1.05e-06
ENSG00000187187	ZNF546	9.30031	1.05e-06
ENSG00000215833	QRSL1P1	-5.48202	1.06e-06
ENSG00000086619	ERO1B	-5.59475	1.08e-06
ENSG00000156475	PPP2R2B	5.13154	1.08e-06
ENSG00000231793	DOC2GP	-5.47533	1.08e-06
ENSG00000165716	DIPK1B	-4.88432	1.09e-06
ENSG00000087303	NID2	4.74628	1.12e-06
ENSG00000156298	TSPAN7	-9.29331	1.13e-06
ENSG00000139737	SLAIN1	-9.29331	1.13e-06
ENSG00000236212	AC009262.1	-9.29331	1.13e-06
ENSG00000258439	AC007956.2	-9.29331	1.13e-06
ENSG00000259295	CSPG4P12	9.28242	1.13e-06
ENSG00000177511	ST8SIA3	9.28242	1.13e-06
ENSG00000287865	AC099552.5	9.28242	1.13e-06
ENSG00000099260	PALMD	4.80235	1.13e-06
ENSG00000270504	AL391422.4	4.98138	1.14e-06
ENSG00000164136	IL15	4.98608	1.14e-06
ENSG00000179403	VWA1	-4.78686	1.16e-06
ENSG00000148357	HMCN2	5.27926	1.17e-06
ENSG00000278224	PRICKLE4	6.54598	1.17e-06
ENSG00000212747	RTL8B	4.80846	1.2e-06
ENSG00000057149	SERPINB3	-5.18968	1.2e-06
ENSG00000213260	YWHAZP5	-9.27423	1.21e-06
ENSG00000164484	TMEM200A	-9.27423	1.21e-06
ENSG00000260302	AP005482.2	-9.27423	1.21e-06
ENSG00000184471	C1QTNF8	9.2643	1.21e-06
ENSG00000162009	SSTR5	9.2643	1.21e-06
ENSG00000242593	AC006148.1	9.2643	1.21e-06
ENSG00000105974	CAV1	-4.69844	1.24e-06
ENSG00000079215	SLC1A3	-5.21732	1.29e-06
ENSG00000262576	PCDHGA4	-5.17119	1.3e-06
ENSG00000208892	SNORA49	-5.72588	1.3e-06
ENSG00000266651	AC093484.4	-9.2549	1.31e-06
ENSG00000280650	KCNIP4-IT1	-9.2549	1.31e-06
ENSG00000173124	ACSM6	-9.2549	1.31e-06
ENSG00000236348	PSMC1P10	-9.2549	1.31e-06
ENSG00000287469	AC044798.3	-9.2549	1.31e-06
ENSG00000249319	AC068533.4	9.24595	1.31e-06
ENSG00000253485	PCDHGA5	-5.42066	1.34e-06
ENSG00000163083	INHBB	5.33421	1.34e-06
ENSG00000182759	MAFA	5.07514	1.34e-06
ENSG00000198610	AKR1C4	5.64038	1.35e-06
ENSG00000165685	TMEM52B	-4.74261	1.37e-06
ENSG00000196081	ZNF724	4.88262	1.4e-06
ENSG00000255508	AP002990.1	4.72796	1.41e-06
ENSG00000284337	AC013271.1	-9.2353	1.41e-06
ENSG00000104313	EYA1	-9.2353	1.41e-06
ENSG00000256417	AC006206.2	-9.2353	1.41e-06
ENSG00000256377	AC009509.2	-9.2353	1.41e-06
ENSG00000204767	INSYN2B	-9.2353	1.41e-06
ENSG00000164619	BMPER	-9.2353	1.41e-06
ENSG00000163121	NEURL3	-9.2353	1.41e-06
ENSG00000085465	OVGP1	9.22736	1.41e-06
ENSG00000230303	AL353743.2	9.22736	1.41e-06
ENSG00000187017	ESPN	4.8532	1.41e-06
ENSG00000186300	ZNF555	5.44281	1.41e-06
ENSG00000196628	TCF4	-4.80071	1.42e-06
ENSG00000105997	HOXA3	-5.05108	1.43e-06
ENSG00000196154	S100A4	4.67318	1.44e-06
ENSG00000140511	HAPLN3	-5.39961	1.46e-06
ENSG00000101265	RASSF2	4.7476	1.48e-06
ENSG00000110944	IL23A	-5.69789	1.5e-06
ENSG00000089356	FXYD3	-4.76916	1.52e-06
ENSG00000104967	NOVA2	-9.21543	1.52e-06
ENSG00000285637	AL161449.2	-9.21543	1.52e-06
ENSG00000226329	AC005682.1	-9.21543	1.52e-06
ENSG00000246985	SOCS2-AS1	-9.21543	1.52e-06
ENSG00000287134	AC106845.1	-9.21543	1.52e-06
ENSG00000099399	MAGEB2	-9.21543	1.52e-06
ENSG00000274204	AL138689.1	-9.21543	1.52e-06
ENSG00000186469	GNG2	-9.21543	1.52e-06
ENSG00000219435	CATSPERZ	9.20854	1.52e-06
ENSG00000202058	RN7SKP80	-4.68065	1.54e-06
ENSG00000225091	SNORA71A	-4.79914	1.58e-06
ENSG00000181894	ZNF329	-5.11909	1.59e-06
ENSG00000206585	RNVU1-7	-4.66316	1.6e-06
ENSG00000186862	PDZD7	5.8868	1.61e-06
ENSG00000166831	RBPMS2	5.59602	1.62e-06
ENSG00000263680	AC007639.1	-9.19529	1.64e-06
ENSG00000102962	CCL22	-9.19529	1.64e-06
ENSG00000120949	TNFRSF8	-9.19529	1.64e-06
ENSG00000101842	VSIG1	-9.19529	1.64e-06
ENSG00000269706	AC008687.6	-9.19529	1.64e-06
ENSG00000155629	PIK3AP1	-5.10941	1.65e-06
ENSG00000170961	HAS2	-4.65435	1.71e-06
ENSG00000139318	DUSP6	-4.73248	1.72e-06
ENSG00000130508	PXDN	4.61743	1.72e-06
ENSG00000008300	CELSR3	4.63824	1.74e-06
ENSG00000225950	NTF4	-5.47487	1.76e-06
ENSG00000163376	KBTBD8	-9.17486	1.77e-06
ENSG00000100341	PNPLA5	-9.17486	1.77e-06
ENSG00000196653	ZNF502	-9.17486	1.77e-06
ENSG00000146938	NLGN4X	-9.17486	1.77e-06
ENSG00000259129	LINC00648	9.17013	1.77e-06
ENSG00000237945	LINC00649	-5.05343	1.8e-06
ENSG00000285816	AP000944.5	5.85392	1.84e-06
ENSG00000056558	TRAF1	-4.9809	1.89e-06
ENSG00000004468	CD38	-9.15414	1.91e-06
ENSG00000272666	U62317.1	-9.15414	1.91e-06
ENSG00000187987	ZSCAN23	-9.15414	1.91e-06
ENSG00000225362	CT62	-9.15414	1.91e-06
ENSG00000054392	HHAT	-9.15414	1.91e-06
ENSG00000241458	RPL7P19	-9.15414	1.91e-06
ENSG00000270038	AL133467.4	9.15053	1.91e-06
ENSG00000227189	AC092535.2	9.15053	1.91e-06
ENSG00000181031	RPH3AL	9.15053	1.91e-06
ENSG00000179776	CDH5	9.15053	1.91e-06
ENSG00000136630	HLX	4.81625	1.91e-06
ENSG00000106078	COBL	4.60646	1.92e-06
ENSG00000078098	FAP	-5.07004	1.92e-06
ENSG00000162105	SHANK2	-4.76305	1.97e-06
ENSG00000174939	ASPHD1	4.68962	1.97e-06
ENSG00000151136	BTBD11	-4.94437	2.01e-06
ENSG00000140931	CMTM3	-4.923	2.01e-06
ENSG00000186472	PCLO	-4.64911	2.04e-06
ENSG00000042832	TG	-9.13311	2.07e-06
ENSG00000219451	RPL23P8	-9.13311	2.07e-06
ENSG00000286606	AC097468.4	-9.13311	2.07e-06
ENSG00000140090	SLC24A4	-9.13311	2.07e-06
ENSG00000279852	AC083964.2	-9.13311	2.07e-06
ENSG00000183023	SLC8A1	-9.13311	2.07e-06
ENSG00000259644	AC022613.3	-9.13311	2.07e-06
ENSG00000235961	PNMA6A	-9.13311	2.07e-06
ENSG00000250770	AC005865.1	-9.13311	2.07e-06
ENSG00000267313	AC021504.1	-9.13311	2.07e-06
ENSG00000160862	AZGP1	9.13067	2.07e-06
ENSG00000165606	DRGX	9.13067	2.07e-06
ENSG00000212939	Z97192.1	9.13067	2.07e-06
ENSG00000142765	SYTL1	-4.73281	2.07e-06
ENSG00000137331	IER3	-4.60465	2.09e-06
ENSG00000136367	ZFHX2	-5.30467	2.1e-06
ENSG00000163638	ADAMTS9	5.06096	2.12e-06
ENSG00000164687	FABP5	-4.60923	2.15e-06
ENSG00000261997	AC007336.1	-5.2971	2.16e-06
ENSG00000130768	SMPDL3B	-5.89124	2.21e-06
ENSG00000103647	CORO2B	-9.11178	2.24e-06
ENSG00000139547	RDH16	-9.11178	2.24e-06
ENSG00000285758	AC036214.4	-9.11178	2.24e-06
ENSG00000260577	AC126773.4	-9.11178	2.24e-06
ENSG00000267774	AC010776.2	-9.11178	2.24e-06
ENSG00000281097	LINC01395	-9.11178	2.24e-06
ENSG00000158427	TMSB15B	-9.11178	2.24e-06
ENSG00000104321	TRPA1	-9.11178	2.24e-06
ENSG00000172243	CLEC7A	-9.11178	2.24e-06
ENSG00000249082	C5orf66-AS1	9.11053	2.24e-06
ENSG00000137801	THBS1	-4.54895	2.26e-06
ENSG00000165757	JCAD	-4.74843	2.26e-06
ENSG00000109667	SLC2A9	-4.73112	2.31e-06
ENSG00000260896	ARLNC1	6.36649	2.41e-06
ENSG00000102760	RGCC	-9.09012	2.43e-06
ENSG00000259202	AC012568.1	-9.09012	2.43e-06
ENSG00000225548	LINC01980	-9.09012	2.43e-06
ENSG00000260860	AC126773.5	-9.09012	2.43e-06
ENSG00000279733	AP001642.1	-9.09012	2.43e-06
ENSG00000229052	AL449283.1	-9.09012	2.43e-06
ENSG00000164743	C8orf48	-9.09012	2.43e-06
ENSG00000176593	AC008969.1	-9.09012	2.43e-06
ENSG00000279656	AL132780.4	-9.09012	2.43e-06
ENSG00000256249	AC026333.3	-9.09012	2.43e-06
ENSG00000259594	AC023034.1	-9.09012	2.43e-06
ENSG00000234997	AC016745.1	-9.09012	2.43e-06
ENSG00000240602	AADACP1	-9.09012	2.43e-06
ENSG00000224550	AC114491.1	9.0901	2.43e-06
ENSG00000127129	EDN2	9.0901	2.43e-06
ENSG00000131370	SH3BP5	4.57066	2.45e-06
ENSG00000227722	AL022100.1	-5.56989	2.46e-06
ENSG00000117472	TSPAN1	-4.57224	2.5e-06
ENSG00000253537	PCDHGA7	-5.26642	2.51e-06
ENSG00000203999	LINC01270	4.82392	2.51e-06
ENSG00000164125	GASK1B	-4.88249	2.55e-06
ENSG00000259863	SH3RF3-AS1	6.35171	2.56e-06
ENSG00000233885	YEATS2-AS1	-4.6389	2.57e-06
ENSG00000131094	C1QL1	4.71738	2.63e-06
ENSG00000204442	FAM155A	9.06938	2.63e-06
ENSG00000104760	FGL1	9.06938	2.63e-06
ENSG00000280837	CPS1-IT1	9.06938	2.63e-06
ENSG00000245311	ARNTL2-AS1	-9.06814	2.63e-06
ENSG00000243859	RPL5P17	-9.06814	2.63e-06
ENSG00000234155	LINC02535	-9.06814	2.63e-06
ENSG00000152128	TMEM163	-9.06814	2.63e-06
ENSG00000235784	HNRNPA1P29	-9.06814	2.63e-06
ENSG00000204941	PSG5	-9.06814	2.63e-06
ENSG00000285831	AC027329.1	-9.06814	2.63e-06
ENSG00000103089	FA2H	4.55268	2.66e-06
ENSG00000189334	S100A14	-4.52545	2.72e-06
ENSG00000113140	SPARC	-4.53121	2.73e-06
ENSG00000183421	RIPK4	-4.52831	2.74e-06
ENSG00000142552	RCN3	4.53755	2.75e-06
ENSG00000198468	FLVCR1-DT	4.9966	2.76e-06
ENSG00000256139	AC007637.1	9.04836	2.86e-06
ENSG00000267280	TBX2-AS1	9.04836	2.86e-06
ENSG00000167741	GGT6	-9.04581	2.86e-06
ENSG00000128284	APOL3	-9.04581	2.86e-06
ENSG00000134769	DTNA	-9.04581	2.86e-06
ENSG00000197977	ELOVL2	-9.04581	2.86e-06
ENSG00000264668	AC138696.1	-9.04581	2.86e-06
ENSG00000196335	STK31	-9.04581	2.86e-06
ENSG00000109625	CPZ	4.75038	2.87e-06
ENSG00000141905	NFIC	4.50372	2.87e-06
ENSG00000138336	TET1	-4.6949	2.88e-06
ENSG00000169239	CA5B	4.52162	2.89e-06
ENSG00000272977	AL008721.2	-4.61549	2.92e-06
ENSG00000107159	CA9	4.92199	2.95e-06
ENSG00000165474	GJB2	-4.55353	2.96e-06
ENSG00000137843	PAK6	-4.65069	2.96e-06
ENSG00000171649	ZIK1	-4.89466	2.99e-06
ENSG00000278318	ZNF229	-5.00512	3.01e-06
ENSG00000149328	GLB1L2	4.51707	3.04e-06
ENSG00000176046	NUPR1	4.60877	3.06e-06
ENSG00000145934	TENM2	-4.49132	3.07e-06
ENSG00000203288	TDRKH-AS1	9.02703	3.11e-06
ENSG00000198237	AC131392.1	9.02703	3.11e-06
ENSG00000239627	RPL12P20	9.02703	3.11e-06
ENSG00000171044	XKR6	-9.02314	3.11e-06
ENSG00000172789	HOXC5	-9.02314	3.11e-06
ENSG00000146233	CYP39A1	-9.02314	3.11e-06
ENSG00000225206	MIR137HG	-9.02314	3.11e-06
ENSG00000259726	CSPG4P11	-9.02314	3.11e-06
ENSG00000239703	RN7SL568P	-9.02314	3.11e-06
ENSG00000237943	PRKCQ-AS1	-9.02314	3.11e-06
ENSG00000187957	DNER	4.48099	3.15e-06
ENSG00000167653	PSCA	4.7109	3.22e-06
ENSG00000134184	GSTM1	4.55009	3.22e-06
ENSG00000253305	PCDHGB6	-4.82197	3.28e-06
ENSG00000197355	UAP1L1	4.51981	3.34e-06
ENSG00000166165	CKB	4.46066	3.38e-06
ENSG00000230484	OR51A10P	9.00537	3.39e-06
ENSG00000227467	LINC01537	9.00537	3.39e-06
ENSG00000271723	MROH7-TTC4	9.00537	3.39e-06
ENSG00000187186	AL162231.1	9.00537	3.39e-06
ENSG00000163075	CFAP221	9.00537	3.39e-06
ENSG00000237706	TRIM51EP	9.00537	3.39e-06
ENSG00000149968	MMP3	-9.0001	3.39e-06
ENSG00000165194	PCDH19	-9.0001	3.39e-06
ENSG00000272913	AC009237.14	-9.0001	3.39e-06
ENSG00000229321	AC008269.1	-9.0001	3.39e-06
ENSG00000152779	SLC16A12	-9.0001	3.39e-06
ENSG00000209582	SNORA48	-5.7779	3.4e-06
ENSG00000224003	YES1P1	-5.18675	3.41e-06
ENSG00000189431	RASSF10	-4.5659	3.47e-06
ENSG00000271601	LIX1L	4.48203	3.51e-06
ENSG00000182141	ZNF708	5.00258	3.53e-06
ENSG00000270722	RNVU1-31	-4.57817	3.54e-06
ENSG00000187922	LCN10	5.67723	3.58e-06
ENSG00000168743	NPNT	4.4507	3.59e-06
ENSG00000123080	CDKN2C	4.47121	3.6e-06
ENSG00000249550	LINC01234	4.68348	3.6e-06
ENSG00000183044	ABAT	-5.17027	3.63e-06
ENSG00000183484	GPR132	-5.17027	3.63e-06
ENSG00000096872	IFT74	-4.64321	3.65e-06
ENSG00000286546	AL079338.1	8.98339	3.7e-06
ENSG00000230074	AL162231.2	8.98339	3.7e-06
ENSG00000272068	AL365181.2	8.98339	3.7e-06
ENSG00000253190	AC084082.1	-8.97668	3.7e-06
ENSG00000285407	AL033530.1	-8.97668	3.7e-06
ENSG00000144045	DQX1	-8.97668	3.7e-06
ENSG00000227640	SOX21-AS1	-8.97668	3.7e-06
ENSG00000170477	KRT4	-8.97668	3.7e-06
ENSG00000257126	FOXG1-AS1	-8.97668	3.7e-06
ENSG00000225760	LINC00431	6.25972	3.7e-06
ENSG00000282304	AC140479.5	-5.28831	3.74e-06
ENSG00000253284	AC092828.1	-4.56262	3.76e-06
ENSG00000164418	GRIK2	4.81928	3.77e-06
ENSG00000154511	DIPK1A	-4.5913	3.77e-06
ENSG00000163531	NFASC	-4.86411	3.82e-06
ENSG00000120658	ENOX1	5.06739	3.87e-06
ENSG00000197594	ENPP1	4.46987	3.88e-06
ENSG00000243708	PLA2G4B	-4.77592	3.92e-06
ENSG00000174233	ADCY6	4.44467	3.97e-06
ENSG00000111348	ARHGDIB	-4.52232	4.03e-06
ENSG00000287656	AL591069.1	8.96107	4.03e-06
ENSG00000281832	LINC00602	8.96107	4.03e-06
ENSG00000257184	AC004080.3	8.96107	4.03e-06
ENSG00000140254	DUOXA1	-8.95288	4.03e-06
ENSG00000281386	AP003500.1	-8.95288	4.03e-06
ENSG00000147573	TRIM55	-8.95288	4.03e-06
ENSG00000269994	AL513318.2	-8.95288	4.03e-06
ENSG00000104827	CGB3	-8.95288	4.03e-06
ENSG00000286488	AC103858.3	-8.95288	4.03e-06
ENSG00000272320	AL445309.1	-8.95288	4.03e-06
ENSG00000223573	TINCR	4.53352	4.04e-06
ENSG00000072163	LIMS2	4.49896	4.06e-06
ENSG00000156500	FAM122C	4.66183	4.07e-06
ENSG00000162366	PDZK1IP1	4.61797	4.07e-06
ENSG00000172264	MACROD2	5.16778	4.18e-06
ENSG00000137462	TLR2	-4.75449	4.26e-06
ENSG00000260816	AC027279.1	-5.24987	4.33e-06
ENSG00000115590	IL1R2	-4.96635	4.35e-06
ENSG00000152580	IGSF10	-5.11968	4.41e-06
ENSG00000144191	CNGA3	8.93839	4.41e-06
ENSG00000228799	LINC01939	8.93839	4.41e-06
ENSG00000263563	UBBP4	-8.92869	4.41e-06
ENSG00000274297	AC009269.5	-8.92869	4.41e-06
ENSG00000115604	IL18R1	-8.92869	4.41e-06
ENSG00000223528	AL359094.1	-8.92869	4.41e-06
ENSG00000189108	IL1RAPL2	-8.92869	4.41e-06
ENSG00000131398	KCNC3	-8.92869	4.41e-06
ENSG00000164283	ESM1	-8.92869	4.41e-06
ENSG00000112183	RBM24	4.73628	4.49e-06
ENSG00000105289	TJP3	4.62702	4.49e-06
ENSG00000250135	AL049795.2	-6.28742	4.49e-06
ENSG00000111700	SLCO1B3	-4.42518	4.51e-06
ENSG00000131067	GGT7	-4.73711	4.55e-06
ENSG00000276107	AC037198.1	-4.81128	4.67e-06
ENSG00000250682	LINC00491	-5.10242	4.71e-06
ENSG00000139725	RHOF	4.37955	4.77e-06
ENSG00000172260	NEGR1	4.75998	4.8e-06
ENSG00000284966	AL138689.2	-4.59347	4.81e-06
ENSG00000163576	EFHB	8.91536	4.82e-06
ENSG00000091831	ESR1	8.91536	4.82e-06
ENSG00000261611	AC010547.4	8.91536	4.82e-06
ENSG00000112769	LAMA4	8.91536	4.82e-06
ENSG00000282221	AC119427.1	-8.90408	4.82e-06
ENSG00000242428	C3orf67-AS1	-8.90408	4.82e-06
ENSG00000061918	GUCY1B1	-8.90408	4.82e-06
ENSG00000123407	HOXC12	-8.90408	4.82e-06
ENSG00000257083	AC073530.1	-8.90408	4.82e-06
ENSG00000244474	UGT1A4	-8.90408	4.82e-06
ENSG00000286843	AL160159.1	-8.90408	4.82e-06
ENSG00000135643	KCNMB4	-8.90408	4.82e-06
ENSG00000130649	CYP2E1	-8.90408	4.82e-06
ENSG00000283393	AC068205.3	-8.90408	4.82e-06
ENSG00000134538	SLCO1B1	-8.90408	4.82e-06
ENSG00000230091	TMEM254-AS1	-8.90408	4.82e-06
ENSG00000241723	AC074276.1	-8.90408	4.82e-06
ENSG00000231131	LNCAROD	-8.90408	4.82e-06
ENSG00000254556	AF131215.2	-8.90408	4.82e-06
ENSG00000275400	AC006001.4	-4.93863	4.84e-06
ENSG00000260257	AL035071.1	-4.4796	4.86e-06
ENSG00000256238	SUPT16HP1	-4.47791	4.87e-06
ENSG00000197646	PDCD1LG2	-6.25229	5.12e-06
ENSG00000172349	IL16	-4.82596	5.13e-06
ENSG00000084710	EFR3B	4.51377	5.16e-06
ENSG00000149256	TENM4	-5.07613	5.2e-06
ENSG00000146242	TPBG	-4.3752	5.22e-06
ENSG00000185669	SNAI3	8.89195	5.29e-06
ENSG00000288054	AL360178.2	8.89195	5.29e-06
ENSG00000287331	AC106045.1	8.89195	5.29e-06
ENSG00000254827	SLC22A18AS	8.89195	5.29e-06
ENSG00000198342	ZNF442	8.89195	5.29e-06
ENSG00000258588	TRIM6-TRIM34	8.89195	5.29e-06
ENSG00000236641	Z99916.1	-8.87904	5.29e-06
ENSG00000123612	ACVR1C	-8.87904	5.29e-06
ENSG00000197093	GAL3ST4	-8.87904	5.29e-06
ENSG00000185904	LINC00839	-8.87904	5.29e-06
ENSG00000177990	DPY19L2	-8.87904	5.29e-06
ENSG00000113430	IRX4	-8.87904	5.29e-06
ENSG00000148704	VAX1	-8.87904	5.29e-06
ENSG00000197085	NPSR1-AS1	-8.87904	5.29e-06
ENSG00000260969	WWOX-AS1	-8.87904	5.29e-06
ENSG00000239887	C1orf226	4.40166	5.31e-06
ENSG00000128510	CPA4	-4.37769	5.41e-06
ENSG00000162006	MSLNL	4.97751	5.57e-06
ENSG00000164938	TP53INP1	-4.43238	5.58e-06
ENSG00000009950	MLXIPL	4.47431	5.6e-06
ENSG00000126882	FAM78A	4.67973	5.64e-06
ENSG00000133943	DGLUCY	-4.3923	5.79e-06
ENSG00000225764	P3H2-AS1	8.86815	5.8e-06
ENSG00000260996	BX255925.1	8.86815	5.8e-06
ENSG00000220868	MRPL35P1	8.86815	5.8e-06
ENSG00000079112	CDH17	8.86815	5.8e-06
ENSG00000181072	CHRM2	-8.85356	5.8e-06
ENSG00000249084	AC027627.1	-8.85356	5.8e-06
ENSG00000278893	AC010533.1	-8.85356	5.8e-06
ENSG00000164406	LEAP2	-8.85356	5.8e-06
ENSG00000287141	AC093675.2	-8.85356	5.8e-06
ENSG00000165810	BTNL9	-8.85356	5.8e-06
ENSG00000275340	FGD5P1	-8.85356	5.8e-06
ENSG00000172031	EPHX4	-8.85356	5.8e-06
ENSG00000250041	AC069360.1	-8.85356	5.8e-06
ENSG00000261267	AC026470.2	-8.85356	5.8e-06
ENSG00000221381	SNORD88B	-6.21627	5.86e-06
ENSG00000215196	BASP1-AS1	4.6191	6.04e-06
ENSG00000186480	INSIG1	4.30749	6.18e-06
ENSG00000232349	YBX1P7	-5.33565	6.27e-06
ENSG00000157404	KIT	8.84396	6.37e-06
ENSG00000124215	CDH26	-8.82762	6.37e-06
ENSG00000183570	PCBP3	-8.82762	6.37e-06
ENSG00000166405	RIC3	-8.82762	6.37e-06
ENSG00000198515	CNGA1	-8.82762	6.37e-06
ENSG00000253218	KLF3P1	-8.82762	6.37e-06
ENSG00000224713	AC025165.1	-8.82762	6.37e-06
ENSG00000185924	RTN4RL1	-8.82762	6.37e-06
ENSG00000237975	FLG-AS1	-8.82762	6.37e-06
ENSG00000259090	SEPTIN7P1	-8.82762	6.37e-06
ENSG00000176153	GPX2	-4.39585	6.46e-06
ENSG00000280916	FOXCUT	4.55937	6.54e-06
ENSG00000229689	AC009237.3	-5.01285	6.61e-06
ENSG00000153093	ACOXL	-4.80417	6.67e-06
ENSG00000228824	MIR4500HG	5.51843	6.74e-06
ENSG00000148516	ZEB1	4.35916	6.77e-06
ENSG00000066735	KIF26A	4.27977	6.83e-06
ENSG00000108947	EFNB3	-5.00358	6.85e-06
ENSG00000286215	AL356534.1	5.22862	6.88e-06
ENSG00000006016	CRLF1	4.32899	6.89e-06
ENSG00000038295	TLL1	4.30772	6.91e-06
ENSG00000235947	EGOT	8.81935	7.01e-06
ENSG00000271992	AL354872.2	8.81935	7.01e-06
ENSG00000277200	AC005696.4	8.81935	7.01e-06
ENSG00000270087	AC010997.3	8.81935	7.01e-06
ENSG00000076258	FMO4	-8.8012	7.01e-06
ENSG00000105409	ATP1A3	-8.8012	7.01e-06
ENSG00000249631	AC005699.1	-8.8012	7.01e-06
ENSG00000178836	AC114812.1	-8.8012	7.01e-06
ENSG00000270953	AC007938.3	-8.8012	7.01e-06
ENSG00000088881	EBF4	-8.8012	7.01e-06
ENSG00000242330	RN7SL683P	-8.8012	7.01e-06
ENSG00000180861	LINC01559	-8.8012	7.01e-06
ENSG00000267745	AC060766.7	-8.8012	7.01e-06
ENSG00000263366	ABHD17AP5	-8.8012	7.01e-06
ENSG00000234476	LINC02765	4.70156	7.03e-06
ENSG00000064042	LIMCH1	4.27476	7.04e-06
ENSG00000236548	RNF217-AS1	-4.6235	7.15e-06
ENSG00000126561	STAT5A	4.28833	7.38e-06
ENSG00000241749	RPSAP52	-5.10663	7.46e-06
ENSG00000072195	SPEG	-4.46359	7.48e-06
ENSG00000049323	LTBP1	4.25931	7.49e-06
ENSG00000151692	RNF144A	-4.69361	7.49e-06
ENSG00000082074	FYB1	-4.43907	7.5e-06
ENSG00000138642	HERC6	-4.37973	7.54e-06
ENSG00000102996	MMP15	4.26491	7.68e-06
ENSG00000125508	SRMS	8.79431	7.73e-06
ENSG00000244558	KCNK15-AS1	8.79431	7.73e-06
ENSG00000170703	TTLL6	8.79431	7.73e-06
ENSG00000285427	SOD2-OT1	8.79431	7.73e-06
ENSG00000188460	ACTBP11	8.79431	7.73e-06
ENSG00000114124	GRK7	8.79431	7.73e-06
ENSG00000236359	OR51B8P	8.79431	7.73e-06
ENSG00000227308	LINC02832	-8.7743	7.73e-06
ENSG00000228709	LINC02575	-8.7743	7.73e-06
ENSG00000286358	AC096647.1	-8.7743	7.73e-06
ENSG00000118976	OTUD4P1	-8.7743	7.73e-06
ENSG00000073737	DHRS9	-8.7743	7.73e-06
ENSG00000185306	C12orf56	-8.7743	7.73e-06
ENSG00000287407	AL596442.3	-8.7743	7.73e-06
ENSG00000234352	AC009264.1	-8.7743	7.73e-06
ENSG00000256268	LINC02454	-8.7743	7.73e-06
ENSG00000131080	EDA2R	-8.7743	7.73e-06
ENSG00000204839	MROH6	4.333	7.73e-06
ENSG00000152495	CAMK4	-4.41444	7.78e-06
ENSG00000198729	PPP1R14C	-4.36372	7.89e-06
ENSG00000168243	GNG4	-4.44821	7.93e-06
ENSG00000115935	WIPF1	4.2754	8.04e-06
ENSG00000166446	CDYL2	4.25375	8.06e-06
ENSG00000254166	CASC19	4.23518	8.22e-06
ENSG00000127364	TAS2R4	-5.26108	8.31e-06
ENSG00000072201	LNX1	-5.26108	8.31e-06
ENSG00000244086	AC110749.1	-5.26108	8.31e-06
ENSG00000131171	SH3BGRL	-4.58031	8.43e-06
ENSG00000167766	ZNF83	4.35698	8.47e-06
ENSG00000113578	FGF1	-4.86269	8.49e-06
ENSG00000226321	CROCC2	8.76884	8.53e-06
ENSG00000150773	PIH1D2	8.76884	8.53e-06
ENSG00000176239	OR51B6	8.76884	8.53e-06
ENSG00000175084	DES	8.76884	8.53e-06
ENSG00000157601	MX1	-4.38742	8.62e-06
ENSG00000012171	SEMA3B	4.22649	8.7e-06
ENSG00000007264	MATK	4.2824	8.87e-06
ENSG00000000971	CFH	-4.3214	9.01e-06
ENSG00000170577	SIX2	4.52798	9.08e-06
ENSG00000169554	ZEB2	4.47797	9.09e-06
ENSG00000116299	KIAA1324	4.42474	9.1e-06
ENSG00000230943	LINC02541	-5.23535	9.15e-06
ENSG00000106538	RARRES2	4.49339	9.21e-06
ENSG00000242288	AC022400.3	-4.57796	9.36e-06
ENSG00000105146	AURKC	-8.74688	9.43e-06
ENSG00000116157	GPX7	-8.74688	9.43e-06
ENSG00000241003	AC108860.1	-8.74688	9.43e-06
ENSG00000138395	CDK15	-8.74688	9.43e-06
ENSG00000287906	AC127526.5	-8.74688	9.43e-06
ENSG00000273449	AC093788.1	-8.74688	9.43e-06
ENSG00000286051	AC244102.3	-8.74688	9.43e-06
ENSG00000112218	GPR63	-8.74688	9.43e-06
ENSG00000259803	SLC22A31	8.7429	9.43e-06
ENSG00000164318	EGFLAM	8.7429	9.43e-06
ENSG00000148513	ANKRD30A	8.7429	9.43e-06
ENSG00000131982	UBE2L2	8.71649	9.43e-06
ENSG00000204455	TRIM51BP	8.71649	9.43e-06
ENSG00000280417	AC096887.2	8.71649	9.43e-06
ENSG00000095370	SH2D3C	8.71649	9.43e-06
ENSG00000135636	DYSF	-4.92719	9.47e-06
ENSG00000140470	ADAMTS17	-5.22231	9.61e-06
ENSG00000107317	PTGDS	5.13251	9.61e-06
ENSG00000178531	CTXN1	4.37848	9.63e-06
ENSG00000141542	RAB40B	4.35127	9.79e-06
ENSG00000130720	FIBCD1	4.2797	9.84e-06
ENSG00000140092	FBLN5	4.34021	9.91e-06
ENSG00000109472	CPE	-4.40071	9.91e-06
ENSG00000196581	AJAP1	-4.25454	1e-05
ENSG00000115339	GALNT3	-4.19377	1.01e-05
ENSG00000198744	MTCO3P12	-4.61565	1.01e-05
ENSG00000276788	SNORD26	-6.06249	1.04e-05
ENSG00000267249	AP005482.4	-6.06249	1.04e-05
ENSG00000115267	IFIH1	-4.29812	1.04e-05
ENSG00000259505	AC009268.1	-8.71893	1.04e-05
ENSG00000225356	AC093840.1	-8.71893	1.04e-05
ENSG00000266865	AC138207.8	-8.71893	1.04e-05
ENSG00000285128	AC092306.1	-8.71893	1.04e-05
ENSG00000129167	TPH1	-8.71893	1.04e-05
ENSG00000231201	AF127577.2	-8.71893	1.04e-05
ENSG00000227802	DNAJB3	-8.71893	1.04e-05
ENSG00000183281	PLGLB1	-8.71893	1.04e-05
ENSG00000229107	ABHD17AP4	-8.71893	1.04e-05
ENSG00000077264	PAK3	-8.71893	1.04e-05
ENSG00000026751	SLAMF7	-8.71893	1.04e-05
ENSG00000276223	AL118522.1	8.68959	1.04e-05
ENSG00000204603	LINC01257	8.68959	1.04e-05
ENSG00000226258	GRM7-AS3	8.68959	1.04e-05
ENSG00000128573	FOXP2	8.68959	1.04e-05
ENSG00000184321	OR51J1	8.68959	1.04e-05
ENSG00000124920	MYRF	4.20885	1.05e-05
ENSG00000244176	AP003733.1	5.40193	1.07e-05
ENSG00000182511	FES	-4.80134	1.07e-05
ENSG00000261730	AL034346.1	4.37905	1.08e-05
ENSG00000179299	NSUN7	-5.00641	1.09e-05
ENSG00000278192	AL118505.1	-4.88742	1.1e-05
ENSG00000162415	ZSWIM5	4.41541	1.1e-05
ENSG00000029153	ARNTL2	-4.1533	1.1e-05
ENSG00000274021	AC024909.1	-4.63004	1.11e-05
ENSG00000202538	RNU4-2	-4.33885	1.11e-05
ENSG00000277969	AC006449.7	5.09475	1.12e-05
ENSG00000238917	SNORD10	-4.36053	1.12e-05
ENSG00000118046	STK11	-4.19123	1.14e-05
ENSG00000123700	KCNJ2	4.42147	1.14e-05
ENSG00000239344	AC090686.1	-8.69043	1.16e-05
ENSG00000140519	RHCG	-8.69043	1.16e-05
ENSG00000264448	MIR378D2HG	-8.69043	1.16e-05
ENSG00000269989	AC036176.3	-8.69043	1.16e-05
ENSG00000253991	AP001207.2	-8.69043	1.16e-05
ENSG00000189269	DRICH1	-8.69043	1.16e-05
ENSG00000267879	AC011483.1	-8.69043	1.16e-05
ENSG00000229000	SEPTIN7P8	-8.69043	1.16e-05
ENSG00000154188	ANGPT1	-8.69043	1.16e-05
ENSG00000133519	ZDHHC8P1	-8.69043	1.16e-05
ENSG00000112599	GUCA1B	-8.69043	1.16e-05
ENSG00000105472	CLEC11A	-8.69043	1.16e-05
ENSG00000163216	SPRR2D	-8.69043	1.16e-05
ENSG00000179344	HLA-DQB1	-8.69043	1.16e-05
ENSG00000167759	KLK13	-8.69043	1.16e-05
ENSG00000286481	AC011246.1	-8.69043	1.16e-05
ENSG00000285920	AC087721.2	-8.69043	1.16e-05
ENSG00000237864	LINC00322	8.66217	1.16e-05
ENSG00000162494	LRRC38	8.66217	1.16e-05
ENSG00000267261	AC099811.2	8.66217	1.16e-05
ENSG00000110484	SCGB2A2	8.66217	1.16e-05
ENSG00000033327	GAB2	4.35199	1.16e-05
ENSG00000079841	RIMS1	4.49539	1.16e-05
ENSG00000166816	LDHD	4.45736	1.18e-05
ENSG00000117114	ADGRL2	-4.25446	1.18e-05
ENSG00000128203	ASPHD2	-4.35342	1.19e-05
ENSG00000067840	PDZD4	4.25947	1.2e-05
ENSG00000121966	CXCR4	4.21085	1.2e-05
ENSG00000132855	ANGPTL3	-5.43991	1.21e-05
ENSG00000149050	ZNF214	5.06902	1.23e-05
ENSG00000153002	CPB1	4.76928	1.23e-05
ENSG00000143375	CGN	-4.25684	1.28e-05
ENSG00000183798	EMILIN3	-8.66136	1.29e-05
ENSG00000287168	AL512625.3	-8.66136	1.29e-05
ENSG00000174808	BTC	-8.66136	1.29e-05
ENSG00000108001	EBF3	-8.66136	1.29e-05
ENSG00000285847	AL713852.1	-8.66136	1.29e-05
ENSG00000174963	ZIC4	-8.66136	1.29e-05
ENSG00000233360	Z83844.2	-8.66136	1.29e-05
ENSG00000286232	AL365229.1	-8.66136	1.29e-05
ENSG00000226555	AGKP1	-8.66136	1.29e-05
ENSG00000177335	C8orf31	8.63423	1.29e-05
ENSG00000126838	PZP	8.63423	1.29e-05
ENSG00000188263	IL17REL	8.63423	1.29e-05
ENSG00000280924	LINC00628	8.63423	1.29e-05
ENSG00000167359	OR51I1	8.63423	1.29e-05
ENSG00000235347	Z84478.1	-4.95954	1.29e-05
ENSG00000132357	CARD6	-4.34071	1.3e-05
ENSG00000235852	AC005540.1	-4.34071	1.3e-05
ENSG00000170439	METTL7B	4.66869	1.31e-05
ENSG00000156804	FBXO32	-4.11973	1.33e-05
ENSG00000122870	BICC1	4.12344	1.33e-05
ENSG00000172345	STARD5	-4.3225	1.33e-05
ENSG00000211897	IGHG3	-4.50425	1.38e-05
ENSG00000204335	SP5	4.48159	1.4e-05
ENSG00000153157	SYCP2L	-5.97898	1.41e-05
ENSG00000284118	MIR4707	5.90225	1.41e-05
ENSG00000205309	NT5M	4.65111	1.41e-05
ENSG00000121406	ZNF549	-4.26082	1.41e-05
ENSG00000241431	RPL37P6	4.86213	1.42e-05
ENSG00000198478	SH3BGRL2	-4.15788	1.42e-05
ENSG00000187098	MITF	4.12771	1.43e-05
ENSG00000227372	TP73-AS1	-4.27669	1.43e-05
ENSG00000175984	DENND2C	-4.21618	1.43e-05
ENSG00000260644	HERC2P5	-8.63168	1.43e-05
ENSG00000175728	C11orf44	-8.63168	1.43e-05
ENSG00000257242	LINC01619	-8.63168	1.43e-05
ENSG00000179331	RAB39A	-8.63168	1.43e-05
ENSG00000260461	AL133355.1	-8.63168	1.43e-05
ENSG00000251503	CENPS-CORT	-8.63168	1.43e-05
ENSG00000186732	MPPED1	-8.63168	1.43e-05
ENSG00000164744	SUN3	-8.63168	1.43e-05
ENSG00000255462	AC104031.1	-8.63168	1.43e-05
ENSG00000131969	ABHD12B	-8.63168	1.43e-05
ENSG00000262803	AL354943.1	-8.63168	1.43e-05
ENSG00000225269	LINC00705	-8.63168	1.43e-05
ENSG00000165799	RNASE7	-8.63168	1.43e-05
ENSG00000235472	EIF4A1P7	-8.63168	1.43e-05
ENSG00000147488	ST18	8.60573	1.43e-05
ENSG00000169026	SLC49A3	8.60573	1.43e-05
ENSG00000171798	KNDC1	8.60573	1.43e-05
ENSG00000287051	AC121757.2	8.60573	1.43e-05
ENSG00000104490	NCALD	5.02954	1.44e-05
ENSG00000229344	MTCO2P12	-5.4064	1.45e-05
ENSG00000173432	SAA1	-5.4064	1.45e-05
ENSG00000267006	AC008507.2	-5.4064	1.45e-05
ENSG00000152661	GJA1	-4.1265	1.46e-05
ENSG00000004399	PLXND1	4.08917	1.46e-05
ENSG00000198959	TGM2	4.08819	1.5e-05
ENSG00000048052	HDAC9	-4.12035	1.5e-05
ENSG00000260630	SNAI3-AS1	4.63332	1.51e-05
ENSG00000163171	CDC42EP3	-4.08221	1.51e-05
ENSG00000272405	AL365181.3	4.46143	1.52e-05
ENSG00000234964	FABP5P7	-4.25789	1.53e-05
ENSG00000119686	FLVCR2	4.13692	1.54e-05
ENSG00000254929	AL591684.2	-4.40453	1.57e-05
ENSG00000113448	PDE4D	4.07047	1.57e-05
ENSG00000240224	UGT1A5	-8.60139	1.6e-05
ENSG00000237870	AC073130.1	-8.60139	1.6e-05
ENSG00000237989	LINC01679	-8.60139	1.6e-05
ENSG00000242097	AC068647.1	-8.60139	1.6e-05
ENSG00000158806	NPM2	-8.60139	1.6e-05
ENSG00000226056	MTND4P32	-8.60139	1.6e-05
ENSG00000261437	AC108860.2	-8.60139	1.6e-05
ENSG00000257038	AP002761.3	8.57666	1.6e-05
ENSG00000012779	ALOX5	8.57666	1.6e-05
ENSG00000114248	LRRC31	8.57666	1.6e-05
ENSG00000060718	COL11A1	8.57666	1.6e-05
ENSG00000228933	AC107419.1	8.57666	1.6e-05
ENSG00000179399	GPC5	8.57666	1.6e-05
ENSG00000167094	TTC16	8.57666	1.6e-05
ENSG00000180264	ADGRD2	8.57666	1.6e-05
ENSG00000270412	AL136084.3	8.57666	1.6e-05
ENSG00000260490	MYL12BP1	-5.08496	1.6e-05
ENSG00000214694	ARHGEF33	4.44783	1.6e-05
ENSG00000172985	SH3RF3	4.15889	1.61e-05
ENSG00000158186	MRAS	4.29869	1.63e-05
ENSG00000031081	ARHGAP31	4.11917	1.63e-05
ENSG00000112414	ADGRG6	-4.09891	1.63e-05
ENSG00000280166	AC016542.3	-5.93534	1.65e-05
ENSG00000221955	SLC12A8	-4.19115	1.66e-05
ENSG00000224389	C4B	4.37133	1.66e-05
ENSG00000113504	SLC12A7	4.08435	1.66e-05
ENSG00000121690	DEPDC7	4.06989	1.67e-05
ENSG00000181027	FKRP	-4.12258	1.68e-05
ENSG00000246575	AC093162.3	-5.07048	1.69e-05
ENSG00000182809	CRIP2	4.07333	1.69e-05
ENSG00000166407	LMO1	4.39037	1.72e-05
ENSG00000105419	MEIS3	4.17957	1.73e-05
ENSG00000279006	AL022323.1	-4.10694	1.76e-05
ENSG00000115828	QPCT	-4.76108	1.76e-05
ENSG00000113389	NPR3	4.07906	1.78e-05
ENSG00000139151	PLCZ1	-8.57044	1.79e-05
ENSG00000103546	SLC6A2	-8.57044	1.79e-05
ENSG00000178573	MAF	-8.57044	1.79e-05
ENSG00000223584	TVP23CP1	-8.57044	1.79e-05
ENSG00000286722	AC009244.2	-8.57044	1.79e-05
ENSG00000287437	AL161662.1	-8.57044	1.79e-05
ENSG00000156886	ITGAD	8.54699	1.79e-05
ENSG00000075043	KCNQ2	8.54699	1.79e-05
ENSG00000279516	FAM230C	8.54699	1.79e-05
ENSG00000223735	OR51B3P	8.54699	1.79e-05
ENSG00000187955	COL14A1	8.54699	1.79e-05
ENSG00000225017	AP004289.1	-4.87366	1.86e-05
ENSG00000267325	LINC01415	-4.73891	1.92e-05
ENSG00000287001	AC010624.5	-4.39218	1.93e-05
ENSG00000081923	ATP8B1	-4.05306	1.95e-05
ENSG00000125657	TNFSF9	4.08094	1.98e-05
ENSG00000139668	WDFY2	-4.0362	1.98e-05
ENSG00000162104	ADCY9	4.01832	2e-05
ENSG00000114631	PODXL2	4.01612	2e-05
ENSG00000248114	AC114812.3	-8.53882	2e-05
ENSG00000250685	AC009123.1	-8.53882	2e-05
ENSG00000175779	LINC02694	-8.53882	2e-05
ENSG00000249715	FER1L5	-8.53882	2e-05
ENSG00000187601	MAGEH1	-8.53882	2e-05
ENSG00000175287	PHYHD1	-8.53882	2e-05
ENSG00000274666	AL133370.2	-8.53882	2e-05
ENSG00000086696	HSD17B2	-8.53882	2e-05
ENSG00000170681	CAVIN4	-8.53882	2e-05
[truncated: 7,894 more rows]
